# Supplementary material for: An Application of Fit Quality to Screen MDM2/p53 Protein-Protein Interaction Inhibitors
Source: MDPI journal article supplement (doi:10.3390/molecules23123174), 2018-12-01
Supplement: s1 [file s1]

# Supplemental Information

## An application of fit quality to screen MDM2/p53 protein-protein interaction inhibitors

Xin Xue <sup>1,\*</sup>, Gang Bao, <sup>1,†</sup> Hai-Qing Zhang, <sup>1,†</sup> Ning-Yi Zhao, <sup>2</sup> Yuan Sun, <sup>3</sup>, Yue Zhang<sup>1</sup>, Xiao-Long Wang<sup>1</sup>

<sup>1</sup> Department of Medicinal Chemistry, Nanjing University of Chinese Medicine, Nanjing 210038, China

<sup>2</sup> Department of Pharmacy, Red Stone Health Industry International Limited, NO.10 Xianlin Street, Nanjing 210038, China

<sup>3</sup> Department of chemistry and biochemistry, The Ohio State University, Columbus, Ohio,43210,USA

† These authors contributed equally to this work.

\* Corresponding authors: Address: Nanjing University of Chinese Medicine, Nanjing 210038, China

Tel/Fax: +86 025 85811916. E-mail address: 300203@njucm.edu.cn (Xin Xue)

1. In the first round of virtual screening (VS), the Receptor-Ligand pharmacophore model (RLPH) was generated from 64 crystal complexes extracted from Protein Data Bank.

**Table S1** The crystal complexes for Receptor-Ligand pharmacophore model generation.

| <b>PDB ID</b> | <b>released data</b> | <b>resolution</b> | <b>PDB ID</b> | <b>released data</b> | <b>resolution</b> |
|---------------|----------------------|-------------------|---------------|----------------------|-------------------|
| 4ZYC          | 2015.7.22            | 1.95              | 3LBL          | 2010.3.16            | 1.6               |
| 3TU1          | 2011.11.2            | 1.6               | 3IWY          | 2010.4.21            | 1.93              |
| 4OQ3          | 2014.4.23            | 2.3               | 4IPF          | 2013.2.20            |                   |
| 6GGN          | 2018.9.26            | 2                 | 4OAS          | 2014.2.19            | 1.7               |
| 5LAV          | 2016.11.2            | 1.73              | 4OCC          | 2014.4.2             | 1.8               |
| 5LAW          | 2016.11.2            | 1.64              | 4ODE          | 2014.4.2             | 1.8               |
| 5LAY          | 2016.11.2            | 2.71              | 4ODF          | 2014.4.2             | 2.2               |
| 5LAZ          | 2016.11.2            | 1.66              | 4OGN          | 2014.4.2             | 1.38              |
| 3TJ2          | 2012.9.12            | 2.1               | 4OGT          | 2014.4.2             | 1.54              |
| 4DIJ          | 2012.5.2             | 1.9               | 4OGV          | 2014.4.2             | 2.2               |
| 5LN2          | 2016.9.7             | 1.58              | 4QOC          | 2015.5.6             | 1.7               |
| 4ZFI          | 2016.10.19           | 2                 | 4WT2          | 2014.12.3            | 1.42              |
| 4ZGK          | 2016.10.19           | 2                 | 5J7F          | 2017.5.17            | 2                 |
| 1RV1          | 2004.1.20            | 2.3               | 5J7G          | 2017.5.17            | 1.85              |
| 3U15          | 2012.6.27            | 1.8               | 5OC8          | 2018.8.22            | 1.56              |
| 3VBG          | 2012.6.27            | 2.8               | 5TRF          | 2016.11.9            | 2.1               |
| 3VZV          | 2013.2.6             | 2.8               | 5Z02          | 2018.1.3             | 1.35              |
| 3W69          | 2013.6.5             | 1.9               | 1T4E          | 2005.2.8             | 2.6               |
| 4ERE          | 2012.5.23            | 1.8               | 2LZG          | 2012.11.7            |                   |
| 4ERF          | 2012.5.23            | 2                 | 3JZK          | 2009.11.17           | 2.1               |
| 4JRG          | 2013.7.24            | 1.9               | 4HBM          | 2012.10.17           | 1.9               |
| 4JSC          | 2013.7.24            | 2.5               | 4HG7          | 2013.7.31            | 1.6               |
| 4JV7          | 2013.5.1             | 2.2               | 4ZYF          | 2015.7.29            | 1.8               |
| 4JV9          | 2013.5.1             | 2.5               | 4ZY1          | 2015.7.29            | 1.67              |
| 4JVE          | 2013.5.1             | 2.3               | 5C5A          | 2016.6.29            | 1.15              |
| 4JVR          | 2013.5.1             | 1.7               | 1TTV          | 2002.1.1             |                   |
| 4JWR          | 2013.5.1             | 2.35              | 3T4E          | 2013.4.24            | 1.91              |
| 4WDN          | 2013.11.13           | 1.9               | 4J74          | 2013.8.7             | 1.2               |
| 4MDQ          | 2013.11.13           | 2.12              | 4J7D          | 2013.8.7             | 1.25              |
| 4OBA          | 2014.3.19            | 1.6               | 4J7E          | 2013.8.7             | 1.63              |
| 4QO4          | 2014.7.16            | 1.7               | 4LWT          | 2014.7.16            | 1.6               |
| 3LBK          | 2010.3.16            | 2.3               | 4LWU          | 2014.7.16            | 1.14              |

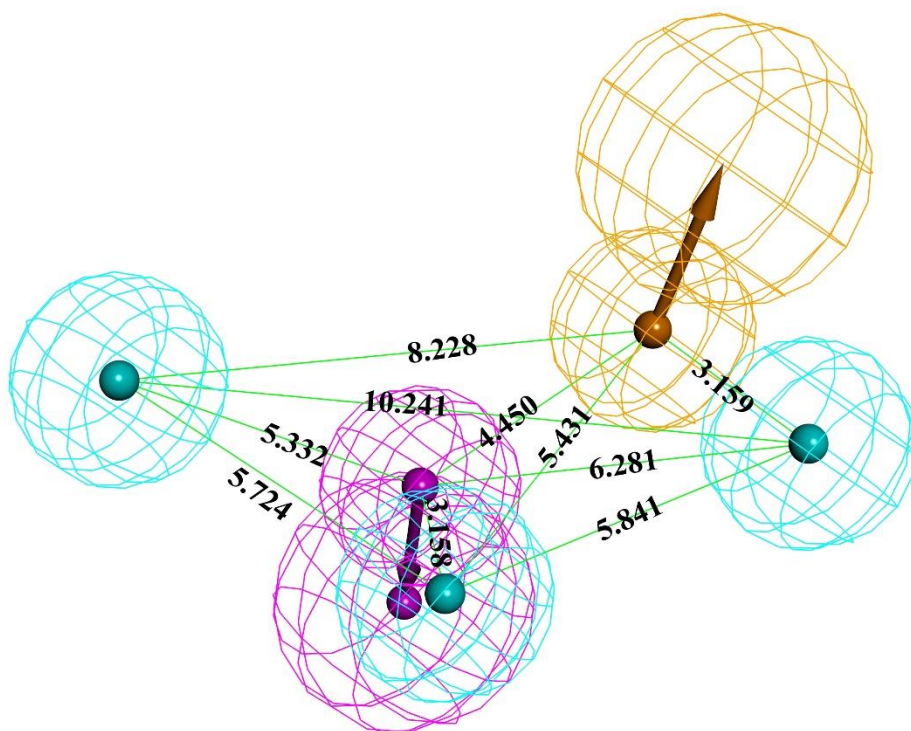

**Figure S1.** The detail information for Receptor-Ligand pharmacophore model. Purple is a hydrogen bond donor; green is a hydrogen bond acceptor, and cyan is a hydrophobic or an aromatic element.

2. 156 MDM2/p53 Protein-Protein interaction inhibitors (PPIIs) assigned to eight groups were collected from literatures for training and test sets. The heavy atoms (HA) of those compounds were counted to calculate their LE and FQ values. All 156 compounds (**Table S2**) divided in group A-H were used as test set, while compounds tagged with \* were used as training set.

**Table S2.** Eight groups of MDM2/p53 PPIIs were collected for training and test set.

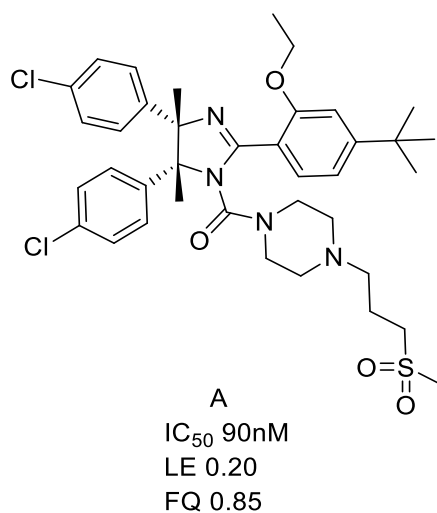

| Name | MDM2/p53 PPIIs       |                   | HA | LE | FQ |
|------|----------------------|-------------------|----|----|----|
|      | IC <sub>50</sub> /nM | pIC <sub>50</sub> |    |    |    |

|       |      |      |    |      |      |
|-------|------|------|----|------|------|
| A-1*  | 52   | 7.28 | 43 | 0.23 | 0.91 |
| A-2   | 30   | 7.52 | 42 | 0.25 | 0.94 |
| A-3*  | 209  | 6.68 | 42 | 0.22 | 0.84 |
| A-4   | 23   | 7.64 | 45 | 0.23 | 0.94 |
| A-5*  | 22   | 7.66 | 48 | 0.22 | 0.92 |
| A-6   | 26   | 7.59 | 45 | 0.23 | 0.93 |
| A-7   | 18   | 7.74 | 49 | 0.22 | 0.93 |
| A-8   | 46   | 7.34 | 49 | 0.21 | 0.88 |
| A-9   | 33   | 7.48 | 48 | 0.21 | 0.90 |
| A-10  | 14   | 7.85 | 50 | 0.22 | 0.94 |
| A-11  | 18   | 7.74 | 51 | 0.21 | 0.92 |
| A-12* | 2163 | 5.66 | 51 | 0.15 | 0.67 |
| A-13  | 232  | 6.63 | 48 | 0.19 | 0.80 |

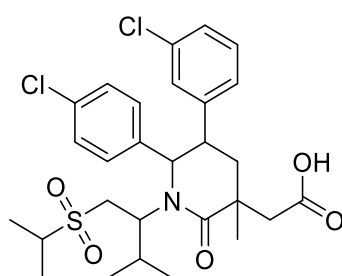

B  
 $IC_{50}$  0.1nM  
 LE 0.37  
 FQ 1.29

| Name  | MDM2/p53 PPIIs |            | HA | LE   | FQ   |
|-------|----------------|------------|----|------|------|
|       | $IC_{50}$ /nM  | $pIC_{50}$ |    |      |      |
| B-1   | 72             | 7.14       | 32 | 0.31 | 0.95 |
| B-2   | 47             | 7.33       | 44 | 0.23 | 0.91 |
| B-3*  | 3              | 8.52       | 36 | 0.32 | 1.11 |
| B-4   | 23             | 7.64       | 40 | 0.26 | 0.97 |
| B-5   | 897            | 6.05       | 47 | 0.18 | 0.73 |
| B-6   | 547            | 6.26       | 42 | 0.20 | 0.78 |
| B-7*  | 14500          | 4.84       | 43 | 0.15 | 0.60 |
| B-8   | 33             | 7.48       | 40 | 0.26 | 0.95 |
| B-9   | 5              | 8.30       | 44 | 0.26 | 1.03 |
| B-10  | 730            | 6.14       | 44 | 0.19 | 0.76 |
| B-11* | 8              | 8.10       | 44 | 0.25 | 1.00 |
| B-12  | 6              | 8.22       | 45 | 0.25 | 1.01 |
| B-13  | 11             | 7.96       | 45 | 0.24 | 0.98 |
| B-14  | 4              | 8.40       | 40 | 0.29 | 1.06 |
| B-15* | 50             | 7.30       | 40 | 0.25 | 0.93 |
| B-16  | 4              | 8.40       | 40 | 0.29 | 1.06 |
| B-17  | 4              | 8.40       | 41 | 0.28 | 1.06 |

|       |     |      |    |      |      |
|-------|-----|------|----|------|------|
| B-18  | 16  | 7.80 | 42 | 0.25 | 0.98 |
| B-19* | 157 | 6.80 | 44 | 0.21 | 0.84 |

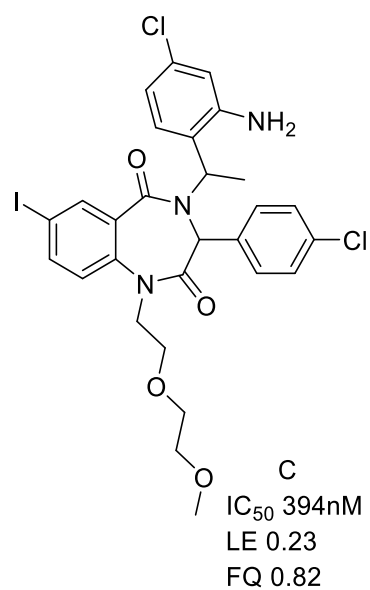

| Name  | MDM2/p53 PPIIs |            | HA | LE   | FQ   |
|-------|----------------|------------|----|------|------|
|       | $IC_{50}$ /nM  | $pIC_{50}$ |    |      |      |
| C-1*  | 0.42           | 9.38       | 32 | 0.40 | 1.25 |
| C-2   | 2.18           | 8.66       | 33 | 0.36 | 1.15 |
| C-3   | 3.33           | 8.48       | 37 | 0.31 | 1.09 |
| C-4*  | 4.35           | 8.36       | 39 | 0.29 | 1.07 |
| C-5   | 10.2           | 7.99       | 36 | 0.30 | 1.04 |
| C-6   | 1.09           | 8.96       | 37 | 0.33 | 1.16 |
| C-7   | 0.51           | 9.29       | 39 | 0.33 | 1.19 |
| C-8   | 36             | 7.44       | 37 | 0.28 | 0.96 |
| C-9   | 0.54           | 9.27       | 33 | 0.38 | 1.23 |
| C-10* | 0.87           | 9.06       | 39 | 0.32 | 1.16 |
| C-11  | 2.82           | 8.55       | 40 | 0.29 | 1.08 |
| C-12  | 2.13           | 8.67       | 36 | 0.33 | 1.13 |
| C-13  | 8.22           | 8.09       | 41 | 0.27 | 1.02 |
| C-14  | 2.15           | 8.67       | 39 | 0.30 | 1.11 |
| C-15  | 0.98           | 9.01       | 40 | 0.31 | 1.14 |
| C-16* | 1.04           | 8.98       | 41 | 0.30 | 1.13 |
| C-17  | 0.71           | 9.15       | 38 | 0.33 | 1.17 |
| C-18  | 1.11           | 8.95       | 39 | 0.31 | 1.14 |

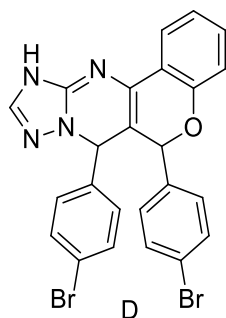

IC<sub>50</sub> 350nM  
LE 0.29  
FQ 0.87

| Name  | MDM2/p53 PPIIs       |                   | HA | LE   | FQ   |
|-------|----------------------|-------------------|----|------|------|
|       | IC <sub>50</sub> /nM | pIC <sub>50</sub> |    |      |      |
| D-1   | 100000               | 4.00              | 31 | 0.18 | 0.54 |
| D-2   | 100000               | 4.00              | 31 | 0.18 | 0.54 |
| D-3   | 100000               | 4.00              | 31 | 0.18 | 0.54 |
| D-4*  | 14800                | 4.83              | 32 | 0.21 | 0.64 |
| D-5   | 1210                 | 5.92              | 32 | 0.25 | 0.79 |
| D-6   | 1170                 | 5.93              | 32 | 0.25 | 0.79 |
| D-7   | 6570                 | 5.18              | 32 | 0.22 | 0.69 |
| D-8   | 890                  | 6.05              | 32 | 0.26 | 0.81 |
| D-9   | 4630                 | 5.33              | 32 | 0.23 | 0.71 |
| D-10* | 2080                 | 5.68              | 33 | 0.24 | 0.75 |
| D-11  | 2478                 | 5.61              | 34 | 0.23 | 0.74 |
| D-12  | 9074                 | 5.04              | 34 | 0.20 | 0.66 |
| D-13  | 100000               | 4.00              | 33 | 0.17 | 0.53 |
| D-14  | 1889                 | 5.72              | 32 | 0.25 | 0.76 |
| D-15  | 4740                 | 5.32              | 32 | 0.23 | 0.71 |
| D-16  | 5840                 | 5.23              | 33 | 0.22 | 0.69 |
| D-17  | 1170                 | 5.93              | 32 | 0.25 | 0.79 |
| D-18  | 1720                 | 5.76              | 33 | 0.24 | 0.76 |
| D-19  | 360                  | 6.44              | 34 | 0.26 | 0.85 |
| D-20  | 910                  | 6.04              | 35 | 0.24 | 0.79 |
| D-21  | 1730                 | 5.76              | 33 | 0.24 | 0.76 |
| D-22  | 1405                 | 5.85              | 33 | 0.24 | 0.78 |
| D-23  | 440                  | 6.36              | 33 | 0.26 | 0.84 |
| D-24  | 3200                 | 5.49              | 34 | 0.22 | 0.72 |
| D-25  | 3065                 | 5.51              | 34 | 0.22 | 0.73 |
| D-26  | 990                  | 6.00              | 33 | 0.25 | 0.80 |
| D-27  | 15100                | 4.82              | 33 | 0.20 | 0.64 |
| D-28  | 3500                 | 5.46              | 33 | 0.23 | 0.72 |
| D-29  | 3940                 | 5.40              | 35 | 0.21 | 0.71 |
| D-30  | 480                  | 6.32              | 34 | 0.25 | 0.83 |
| D-31  | 100000               | 4.00              | 34 | 0.16 | 0.53 |

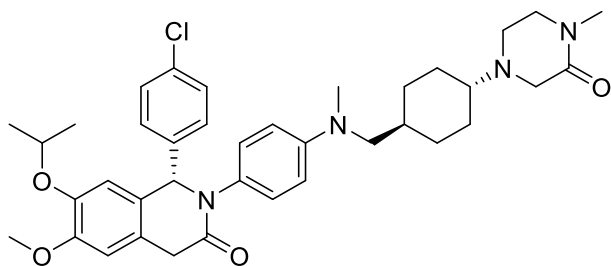

**E**  
 $IC_{50}$  350nM  
 LE 0.19  
 FQ 0.78

| Name  | MDM2/p53 PPIIs |            | HA | LE   | FQ   |
|-------|----------------|------------|----|------|------|
|       | $IC_{50}$ /nM  | $pIC_{50}$ |    |      |      |
| E-1*  | 3860           | 5.41       | 40 | 0.19 | 0.69 |
| E-2   | 1090           | 5.96       | 40 | 0.20 | 0.76 |
| E-3   | 2850           | 5.55       | 41 | 0.19 | 0.70 |
| E-4*  | 1130           | 5.95       | 43 | 0.19 | 0.74 |
| E-5   | 710            | 6.15       | 42 | 0.20 | 0.77 |
| E-6   | 14500          | 4.84       | 43 | 0.15 | 0.60 |
| E-7   | 4960           | 5.30       | 45 | 0.16 | 0.65 |
| E-8   | 350            | 6.46       | 45 | 0.20 | 0.79 |
| E-9   | 11300          | 4.95       | 46 | 0.15 | 0.60 |
| E-10* | 5000           | 5.30       | 42 | 0.17 | 0.66 |
| E-11  | 13200          | 4.88       | 46 | 0.15 | 0.60 |
| E-12  | 20000          | 4.70       | 47 | 0.14 | 0.57 |
| E-13  | 20000          | 4.70       | 47 | 0.14 | 0.57 |
| E-14* | 20000          | 4.70       | 47 | 0.14 | 0.57 |

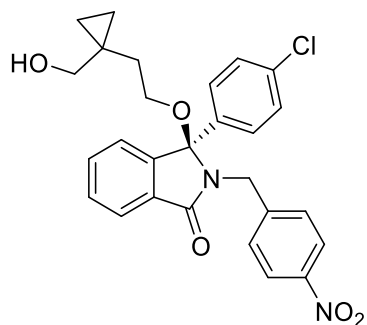

**F**  
 $IC_{50}$  170nM  
 LE 0.30  
 FQ 0.89

| Name | MDM2/p53 PPIIs |            | HA | LE   | FQ   |
|------|----------------|------------|----|------|------|
|      | $IC_{50}$ /nM  | $pIC_{50}$ |    |      |      |
| F-1  | 90000          | 4.05       | 33 | 0.17 | 0.54 |
| F-2  | 85000          | 4.07       | 33 | 0.17 | 0.54 |
| F-3  | 27000          | 4.57       | 41 | 0.15 | 0.58 |

|       |        |      |    |      |      |
|-------|--------|------|----|------|------|
| F-4*  | 66000  | 4.18 | 31 | 0.18 | 0.56 |
| F-5   | 70000  | 4.15 | 34 | 0.17 | 0.55 |
| F-6   | 284000 | 3.55 | 34 | 0.14 | 0.47 |
| F-7   | 393000 | 3.41 | 31 | 0.15 | 0.46 |
| F-8   | 78000  | 4.11 | 35 | 0.16 | 0.54 |
| F-9   | 311000 | 3.51 | 36 | 0.13 | 0.46 |
| F-10  | 58000  | 4.24 | 32 | 0.18 | 0.57 |
| F-11  | 96000  | 4.02 | 38 | 0.14 | 0.52 |
| F-12  | 243000 | 3.61 | 32 | 0.15 | 0.48 |
| F-13  | 345000 | 3.46 | 30 | 0.16 | 0.47 |
| F-14  | 490000 | 3.31 | 28 | 0.16 | 0.45 |
| F-15  | 500000 | 3.30 | 29 | 0.16 | 0.45 |
| F-16  | 181000 | 3.74 | 34 | 0.15 | 0.49 |
| F-17  | 413000 | 3.38 | 29 | 0.16 | 0.46 |
| F-18* | 88000  | 4.06 | 40 | 0.14 | 0.51 |
| F-19  | 500000 | 3.30 | 24 | 0.19 | 0.47 |
| F-20  | 70000  | 4.15 | 29 | 0.20 | 0.57 |
| F-21  | 70200  | 4.15 | 37 | 0.15 | 0.54 |
| F-22  | 103000 | 3.99 | 43 | 0.13 | 0.50 |
| F-23  | 100000 | 4.00 | 36 | 0.15 | 0.52 |

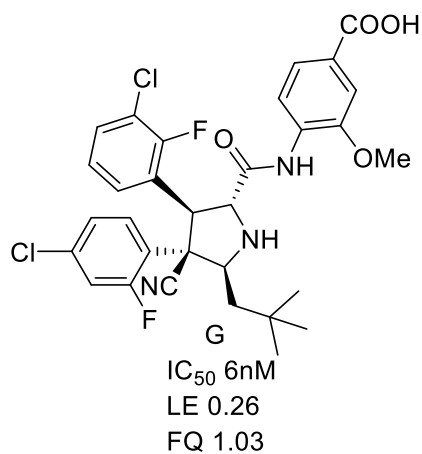

| Name  | MDM2/p53 PPIs        |                   | HA | LE   | FQ   |
|-------|----------------------|-------------------|----|------|------|
|       | IC <sub>50</sub> /nM | pIC <sub>50</sub> |    |      |      |
| G-1*  | 196                  | 6.71              | 35 | 0.26 | 0.88 |
| G-2   | 74                   | 7.13              | 37 | 0.26 | 0.92 |
| G-3   | 56                   | 7.25              | 41 | 0.24 | 0.91 |
| G-4*  | 42                   | 7.38              | 40 | 0.25 | 0.93 |
| G-5   | 23                   | 7.64              | 40 | 0.26 | 0.97 |
| G-6   | 22                   | 7.66              | 44 | 0.24 | 0.95 |
| G-7   | 20                   | 7.70              | 42 | 0.25 | 0.96 |
| G-8*  | 21                   | 7.68              | 41 | 0.26 | 0.97 |
| G-9   | 25                   | 7.60              | 41 | 0.25 | 0.96 |
| G-10* | 6                    | 8.22              | 42 | 0.27 | 1.03 |



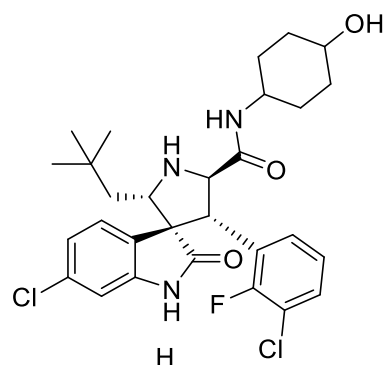

IC<sub>50</sub> 214nM

LE 0.28

FQ 0.86

| Name  | MDM2/p53 PPIIs       |                   | HA | LE   | FQ   |
|-------|----------------------|-------------------|----|------|------|
|       | IC <sub>50</sub> /nM | pIC <sub>50</sub> |    |      |      |
| H-1   | 819                  | 6.09              | 29 | 0.29 | 0.83 |
| H-2   | 1075                 | 5.97              | 28 | 0.29 | 0.82 |
| H-3   | 563                  | 6.25              | 39 | 0.22 | 0.80 |
| H-4*  | 157                  | 6.80              | 26 | 0.36 | 0.95 |
| H-5   | 2064                 | 5.69              | 28 | 0.28 | 0.78 |
| H-6   | 57                   | 7.24              | 29 | 0.34 | 0.99 |
| H-7   | 36500                | 4.44              | 28 | 0.22 | 0.61 |
| H-8   | 40100                | 4.40              | 29 | 0.21 | 0.60 |
| H-9*  | 15600                | 4.81              | 33 | 0.20 | 0.64 |
| H-10  | 18300                | 4.74              | 35 | 0.19 | 0.62 |
| H-11  | 5500                 | 5.26              | 24 | 0.30 | 0.74 |
| H-12  | 15200                | 4.82              | 29 | 0.23 | 0.66 |
| H-13  | 30700                | 4.51              | 32 | 0.19 | 0.60 |
| H-14  | 16000                | 4.80              | 28 | 0.23 | 0.66 |
| H-15  | 13500                | 4.87              | 28 | 0.24 | 0.67 |
| H-16  | 157                  | 6.80              | 25 | 0.37 | 0.95 |
| H-17  | 229                  | 6.64              | 26 | 0.35 | 0.92 |
| H-18* | 62                   | 7.21              | 27 | 0.37 | 1.00 |
| H-19  | 107                  | 6.97              | 32 | 0.30 | 0.93 |
| H-20* | 137                  | 6.86              | 33 | 0.28 | 0.91 |
| H-21  | 212                  | 6.67              | 38 | 0.24 | 0.86 |
| H-22  | 39                   | 7.41              | 31 | 0.33 | 0.99 |
| H-23  | 2                    | 8.70              | 32 | 0.37 | 1.16 |
| H-24  | 80                   | 7.10              | 31 | 0.31 | 0.95 |
| H-25  | 81                   | 7.09              | 38 | 0.26 | 0.91 |
| H-26  | 4                    | 8.40              | 38 | 0.30 | 1.08 |
| H-27  | 16                   | 7.80              | 38 | 0.28 | 1.00 |
| H-28* | 2                    | 8.70              | 44 | 0.27 | 1.08 |

3. The first round of VS was performed by using RLPH with the FitValue ranked.

**Table S3.** Validation results of the hit identification rate (higher EF) at all levels of screening threshold for constructed Receptor-Ligand pharmacophore model.

| Parameter           | PH screening method |      |      |      |      |
|---------------------|---------------------|------|------|------|------|
| Screening Threshold | 0.5%                | 1%   | 1.5% | 2%   | 2.5% |
| <i>a</i>            | 13                  | 30   | 41   | 50   | 61   |
| <i>n</i>            | 17                  | 34   | 51   | 68   | 86   |
| <i>A</i>            | 466                 | 466  | 466  | 466  | 466  |
| <i>N</i>            | 3418                | 3418 | 3418 | 3418 | 3418 |
| EF                  | 5.61                | 6.47 | 5.90 | 5.39 | 5.20 |

**Table S4.** 1% out of the library, 335 compounds, passed the first VS by Receptor-Ligand pharmacophore model from NCI and SPECS databases.

| Index | NAME/IDNUMBER | MW     | HA | FitValue |
|-------|---------------|--------|----|----------|
| 1     | ZINC04390289  | 359.42 | 27 | 3.65     |
| 2     | ZINC02178970  | 439.56 | 32 | 3.41     |
| 3     | ZINC08648874  | 489.36 | 32 | 3.29     |
| 4     | F2692-0095    | 499.58 | 36 | 3.82     |
| 5     | F2029-0601    | 458.55 | 31 | 3.61     |
| 6     | F0580-0392    | 456.52 | 33 | 3.59     |
| 7     | F0580-0398    | 470.54 | 34 | 3.58     |
| 8     | F0570-0057    | 470.61 | 32 | 3.56     |
| 9     | F0580-0397    | 470.54 | 34 | 3.52     |
| 10    | F0580-0403    | 484.57 | 35 | 3.44     |
| 11    | F1607-1058    | 491.95 | 34 | 3.42     |
| 12    | F2692-0077    | 485.55 | 35 | 3.33     |
| 13    | F1607-0980    | 491.95 | 34 | 3.27     |
| 14    | ZINC01027435  | 505.92 | 32 | 5.16     |
| 15    | ZINC01027072  | 475.43 | 31 | 4.78     |
| 16    | ZINC08637136  | 493.61 | 33 | 3.83     |
| 17    | ZINC04297060  | 398.47 | 28 | 3.51     |
| 18    | ZINC02142855  | 490.32 | 31 | 3.49     |
| 19    | ZINC03046141  | 388.29 | 26 | 3.39     |
| 20    | ZINC01027046  | 491.89 | 31 | 3.34     |
| 21    | ZINC03185768  | 417.56 | 30 | 3.13     |
| 22    | ZINC03185778  | 381.88 | 26 | 3.03     |
| 23    | STOCK1N-31983 | 582.67 | 42 | 4.52     |
| 24    | STOCK1N-36517 | 483.95 | 35 | 4.18     |
| 25    | STOCK1N-34721 | 509.55 | 38 | 4.15     |
| 26    | STOCK1N-34937 | 614.64 | 46 | 4.13     |

|    |                                             |        |    |      |
|----|---------------------------------------------|--------|----|------|
| 27 | STOCK1N-32729                               | 665.53 | 45 | 4.11 |
| 28 | STOCK1N-33413                               | 649.49 | 44 | 4.1  |
| 29 | STOCK1N-33491                               | 665.53 | 45 | 4.08 |
| 30 | STOCK1N-33053                               | 595.44 | 40 | 4.04 |
| 31 | STOCK1N-33483                               | 635.5  | 43 | 4.04 |
| 32 | STOCK1N-35012                               | 496.94 | 36 | 3.94 |
| 33 | STOCK1N-40071                               | 534.65 | 40 | 3.86 |
| 34 | STOCK1N-35519                               | 492.52 | 37 | 3.74 |
| 35 | STOCK1N-33261                               | 639.92 | 42 | 3.7  |
| 36 | STOCK1N-33516                               | 684.37 | 42 | 3.7  |
| 37 | STOCK1N-32961                               | 605.47 | 41 | 3.59 |
| 38 | STOCK1N-32687                               | 635.5  | 43 | 3.57 |
| 39 | STOCK1N-29646                               | 571.62 | 43 | 3.52 |
| 40 | STOCK1N-32878                               | 444.52 | 33 | 3.46 |
| 41 | STOCK1N-38179                               | 506.59 | 38 | 3.44 |
| 42 | STOCK1N-31577                               | 498.96 | 36 | 3.43 |
| 43 | STOCK1N-33204                               | 605.48 | 41 | 3.38 |
| 44 | STOCK1N-39437                               | 479.53 | 36 | 3.32 |
| 45 | STOCK1N-33649                               | 675.61 | 46 | 3.27 |
| 46 | STOCK1N-32758                               | 527.57 | 40 | 3.26 |
| 47 | STOCK1N-30511                               | 482.5  | 36 | 3.26 |
| 48 | STOCK1N-48215                               | 540.61 | 41 | 3.24 |
| 49 | STOCK1N-29715                               | 498.96 | 36 | 3.21 |
| 50 | STOCK1N-22270                               | 518.65 | 39 | 3.2  |
| 51 | STOCK1N-33428                               | 414.5  | 31 | 3.15 |
| 52 | STOCK1N-36313                               | 494.5  | 37 | 3.11 |
| 53 | STOCK1N-02317                               | 573.7  | 41 | 3.06 |
|    | N-(4,6-dimethyl-2-pyrimidinyl)-             |        |    |      |
| 54 | N'-(4-ethylphenyl)-N''-(10H-phenothiaz      | 494.61 | 36 | 4.04 |
|    | N-(4,6-dimethyl-2-pyrimidinyl)-             |        |    |      |
| 55 | N'-(4-methoxyphenyl)-N''-(10H-phenothia     | 496.58 | 36 | 3.95 |
|    | 11-(2,4,5-trimethoxyphenyl)-3-              |        |    |      |
| 56 | (3,4,5-trimethoxyphenyl)-2,3,4,5,10,11-h    | 546.61 | 40 | 3.73 |
|    | 11-[4-(methylsulfanyl)phenyl]-3-            |        |    |      |
| 57 | (3,4,5-trimethoxyphenyl)-2,3,4,5,10,11      | 502.63 | 36 | 3.39 |
|    | N-(4-chlorophenyl)-N'-(4,6-                 |        |    |      |
| 58 | dimethyl-2-pyrimidinyl)-N''-(10H-phenothiaz | 501    | 35 | 3.38 |

|    |                                                                        |        |    |      |
|----|------------------------------------------------------------------------|--------|----|------|
| 59 | 11-(5-methyl-2-thienyl)-3-(3,4,5-trimethoxyphenyl)-2,3,4,5,10,11-hexah | 476.59 | 34 | 3.33 |
| 60 | AF-399                                                                 | 379.34 | 26 | 3.31 |
| 61 | 11-(1,3-benzodioxol-5-yl)-3-(3,4,5-trimethoxyphenyl)-2,3,4,5,10,11-hex | 500.54 | 37 | 3.26 |
| 62 | 11-(3-bromo-4,5-dimethoxyphenyl)-3-(3,4,5-trimethoxyphenyl)-2,3,4,5,10 | 595.48 | 39 | 3.26 |
| 63 | 1-(2,3-diphenyl-1H-benzo[g]indol-1-yl)-3-(4,5-diphenyl-1H-imidazol-1-y | 595.73 | 46 | 3.24 |
| 64 | 1-(5,7-dimethyl-2,3-diphenyl-1H-indol-1-yl)-3-(4,5-diphenyl-1H-imidazo | 573.73 | 44 | 3.13 |
| 65 | 11-(3-fluorophenyl)-10-(trifluoroacetyl)-3-(3,4,5-trimethoxyphenyl)-2, | 570.53 | 41 | 3.12 |
| 66 | NSC 13630                                                              | 464.86 | 30 | 4.11 |
| 67 | NSC 49789                                                              | 438.61 | 28 | 3.63 |
| 68 | NSC 18211                                                              | 383.52 | 28 | 3.63 |
| 69 | NSC 69184                                                              | 376.4  | 28 | 3.56 |
| 70 | NSC 18207                                                              | 355.47 | 26 | 3.45 |
| 71 | NSC 36506                                                              | 446.5  | 33 | 3.31 |
| 72 | NSC 71214                                                              | 432.7  | 26 | 3.29 |
| 73 | NSC 84095                                                              | 355.43 | 27 | 3.24 |
| 74 | NSC 99550                                                              | 385.5  | 30 | 3.21 |
| 75 | NSC 22535                                                              | 598.78 | 46 | 3.18 |
| 76 | NSC 69899                                                              | 923.01 | 68 | 3.16 |
| 77 | SPB 05822                                                              | 388.29 | 26 | 3.02 |
| 78 | ZINC70687027                                                           | 540.61 | 41 | 4.3  |
| 79 | ZINC70687439                                                           | 540.61 | 41 | 4.22 |
| 80 | ZINC70686506                                                           | 562.84 | 36 | 3.83 |
| 81 | ZINC70686851                                                           | 584.62 | 44 | 3.67 |
| 82 | ZINC20756120                                                           | 490.49 | 36 | 3.62 |
| 83 | ZINC70686508                                                           | 562.84 | 36 | 3.61 |
| 84 | ZINC70687674                                                           | 556.61 | 42 | 3.56 |
| 85 | ZINC70687669                                                           | 527.57 | 40 | 3.48 |
| 86 | ZINC59485880                                                           | 507.58 | 38 | 3.45 |
| 87 | ZINC12880882                                                           | 490.49 | 36 | 3.42 |
| 88 | ZINC35363850                                                           | 513.97 | 37 | 3.42 |
| 89 | ZINC70706882                                                           | 550.61 | 39 | 3.37 |

|     |                                                                        |        |    |      |
|-----|------------------------------------------------------------------------|--------|----|------|
| 90  | ZINC70687722                                                           | 570.63 | 43 | 3.35 |
| 91  | ZINC02109854                                                           | 539.62 | 40 | 3.33 |
| 92  | ZINC15968695                                                           | 519.57 | 38 | 3.29 |
| 93  | ZINC70687660                                                           | 584.66 | 44 | 3.26 |
| 94  | ZINC70686793                                                           | 511.57 | 39 | 3.21 |
| 95  | ZINC70686605                                                           | 532.67 | 40 | 3.18 |
| 96  | ZINC70705922                                                           | 571.62 | 42 | 3.17 |
| 97  | ZINC70706887                                                           | 553.65 | 39 | 3.16 |
| 98  | ZINC70687774                                                           | 556.61 | 42 | 3.13 |
| 99  | ZINC70706625                                                           | 558.61 | 41 | 3.08 |
| 100 | ZINC70687338                                                           | 541.6  | 41 | 3.04 |
| 101 | ZINC70706121                                                           | 555.6  | 41 | 3.03 |
| 102 | ZINC11866307                                                           | 457.52 | 34 | 3.31 |
| 103 | ZINC31166474                                                           | 412.43 | 30 | 4.22 |
| 104 | ZINC08635519                                                           | 497.63 | 35 | 4.21 |
| 105 | ZINC03839167                                                           | 507.58 | 37 | 3.73 |
| 106 | ZINC35415844-2                                                         | 447.57 | 33 | 3.17 |
| 107 | STOCK1N-30600                                                          | 435.47 | 33 | 3    |
| 108 | 2-(2-methylphenoxy)-N-(2- [(2-methylphenoxy)acetyl]amino phenyl)acetam | 404.46 | 30 | 3.01 |
| 109 | ZINC70687869                                                           | 584.66 | 44 | 3.02 |
| 110 | ZINC70687857                                                           | 540.61 | 41 | 3    |
| 111 | ZINC70706946                                                           | 569.63 | 42 | 3    |
| 112 | NSC 1049                                                               | 376.06 | 17 | 3.36 |
| 113 | NSC 2855                                                               | 330.48 | 23 | 3.32 |
| 114 | NSC 5460                                                               | 381.16 | 24 | 3.24 |
| 115 | NSC 391                                                                | 324.2  | 21 | 3.23 |
| 116 | NSC 7215                                                               | 256.35 | 19 | 3.19 |
| 117 | NSC 1050                                                               | 408.06 | 19 | 3.14 |
| 118 | NSC 4924                                                               | 327.36 | 23 | 3.13 |
| 119 | NSC 5885                                                               | 279.34 | 21 | 3.11 |
| 120 | NSC 7871                                                               | 385.25 | 26 | 3.1  |
| 121 | NSC 4479                                                               | 356.43 | 23 | 3.08 |
| 122 | NSC 3237                                                               | 422.58 | 27 | 3.07 |
| 123 | NSC 683                                                                | 284.42 | 20 | 3.04 |
| 124 | NSC 8360                                                               | 480.02 | 34 | 3    |
| 125 | NSC 69898                                                              | 838.94 | 62 | 3.48 |
| 126 | NSC 84095                                                              | 355.43 | 27 | 3.24 |
| 127 | HTS 00131                                                              | 459.49 | 33 | 3.64 |
| 128 | SPB 05646                                                              | 304.3  | 22 | 3.5  |
| 129 | RJF 00940                                                              | 348.85 | 23 | 3.47 |

|     |              |        |    |      |
|-----|--------------|--------|----|------|
| 130 | BTB 04860    | 426.22 | 28 | 3.41 |
| 131 | KM 01222     | 476.78 | 28 | 3.34 |
| 132 | SPB 05822    | 388.29 | 26 | 3.3  |
| 133 | BTB 04175    | 379.92 | 25 | 3.14 |
| 134 | BTB 06517    | 339.36 | 23 | 3.04 |
| 135 | GK 01508     | 510.31 | 35 | 3.04 |
| 136 | RH 01670     | 447.5  | 30 | 3.93 |
| 137 | RH 01679     | 369.55 | 25 | 3.9  |
| 138 | BTB 05674    | 441.45 | 30 | 3.81 |
| 139 | RH 01967     | 366.84 | 26 | 3.51 |
| 140 | RJF 01798    | 303.34 | 22 | 3.48 |
| 141 | NSC 985      | 317.26 | 18 | 3.58 |
| 142 | NSC 308      | 499.82 | 18 | 3.47 |
| 143 | NSC 5844     | 383.27 | 26 | 3.46 |
| 144 | NSC 364      | 281.13 | 18 | 3.42 |
| 145 | NSC 3753     | 304.36 | 21 | 3.38 |
| 146 | NSC 1014     | 341.41 | 26 | 3.33 |
| 147 | NSC 4112     | 287.16 | 17 | 3.36 |
| 148 | AE-562       | 359.53 | 25 | 3.61 |
| 149 | ZINC05217831 | 387.43 | 28 | 4.17 |
| 150 | ZINC04157245 | 359.8  | 25 | 3.94 |
| 151 | ZINC09594416 | 432.31 | 27 | 3.5  |
| 152 | ZINC01112039 | 355.83 | 23 | 3.44 |
| 153 | ZINC08439189 | 443.53 | 30 | 3.31 |
| 154 | ZINC08439200 | 435.92 | 29 | 3.24 |
| 155 | ZINC00119495 | 323.76 | 23 | 3.2  |
| 156 | ZINC35830493 | 443.41 | 32 | 3.18 |
| 157 | ZINC17968970 | 386.43 | 27 | 3.66 |
| 158 | ZINC00632474 | 393.83 | 27 | 3.14 |
| 159 | ZINC02483499 | 481.56 | 34 | 3.12 |
| 160 | ZINC00687864 | 394.44 | 27 | 3.07 |
| 161 | ZINC00684653 | 388.26 | 24 | 3.06 |
| 162 | ZINC04707806 | 309.75 | 22 | 3.68 |
| 163 | ZINC13597219 | 301.19 | 18 | 3.64 |
| 164 | ZINC04823467 | 399.34 | 28 | 3.62 |
| 165 | ZINC13597762 | 245.23 | 18 | 3.59 |
| 166 | ZINC04707806 | 309.75 | 22 | 3.59 |
| 167 | ZINC13152247 | 462.14 | 25 | 3.55 |
| 168 | ZINC17949075 | 401.22 | 27 | 3.52 |
| 169 | ZINC13130011 | 253.26 | 19 | 3.48 |
| 170 | ZINC00138096 | 332.87 | 21 | 3.48 |
| 171 | ZINC01574971 | 284.20 | 17 | 3.47 |

---

|     |               |        |    |      |
|-----|---------------|--------|----|------|
| 172 | ZINC17858074  | 359.26 | 22 | 3.46 |
| 173 | ZINC15990251  | 286.33 | 21 | 3.43 |
| 174 | ZINC18098743  | 388.47 | 29 | 3.43 |
| 175 | ZINC13597219  | 301.19 | 18 | 3.41 |
| 176 | ZINC17968970  | 386.43 | 27 | 3.38 |
| 177 | ZINC15990220  | 244.27 | 18 | 3.37 |
| 178 | ZINC15990251  | 287.34 | 21 | 3.33 |
| 179 | ZINC01045051  | 367.25 | 23 | 3.32 |
| 180 | ZINC00002036  | 238.29 | 18 | 3.31 |
| 181 | ZINC13597758  | 249.65 | 17 | 3.31 |
| 182 | ZINC01649010  | 295.4  | 21 | 3.26 |
| 183 | ZINC00163657  | 258.27 | 19 | 3.23 |
| 184 | ZINC04707664  | 451.11 | 24 | 3.22 |
| 185 | ZINC18153859  | 293.12 | 17 | 3.22 |
| 186 | ZINC18219562  | 346.83 | 23 | 3.17 |
| 187 | ZINC01686467  | 329.78 | 23 | 3.17 |
| 188 | ZINC17858074  | 359.26 | 22 | 3.13 |
| 189 | ZINC05640410  | 292.29 | 19 | 3.09 |
| 190 | ZINC01718486  | 385.25 | 26 | 3.07 |
| 191 | ZINC08581317  | 304.36 | 21 | 3.06 |
| 192 | STOCK1N-04142 | 428.32 | 27 | 4.66 |
| 193 | STOCK1N-05707 | 324.37 | 24 | 4.6  |
| 194 | STOCK1N-00355 | 379.41 | 28 | 4.5  |
| 195 | STOCK1N-07078 | 325.32 | 24 | 4.43 |
| 196 | STOCK1N-03083 | 328.36 | 24 | 4.43 |
| 197 | STOCK1N-02095 | 340.37 | 25 | 4.42 |
| 198 | STOCK1N-06661 | 366.41 | 27 | 4.39 |
| 199 | STOCK1N-01378 | 366.41 | 27 | 4.38 |
| 200 | STOCK1N-01610 | 381.42 | 28 | 4.37 |
| 201 | STOCK1N-06501 | 338.36 | 25 | 4.37 |
| 202 | STOCK1N-06154 | 394.46 | 29 | 4.33 |
| 203 | STOCK1N-00242 | 342.39 | 25 | 4.32 |
| 204 | STOCK1N-00322 | 352.38 | 26 | 4.27 |
| 205 | STOCK1N-03781 | 342.39 | 25 | 4.18 |
| 206 | STOCK1N-01777 | 310.34 | 23 | 4.18 |
| 207 | STOCK1N-05528 | 291.35 | 22 | 3.68 |
| 208 | STOCK1N-04034 | 386.44 | 28 | 3.46 |
| 209 | STOCK1N-04873 | 396.39 | 29 | 3.38 |
| 210 | STOCK1N-03803 | 357.36 | 26 | 3.34 |
| 211 | STOCK1N-03839 | 327.37 | 24 | 3.31 |
| 212 | STOCK1N-03575 | 310.35 | 23 | 3.24 |
| 213 | STOCK1N-05640 | 374.43 | 27 | 3.11 |

---

|     |               |        |    |      |
|-----|---------------|--------|----|------|
| 214 | STOCK1N-02028 | 309.36 | 23 | 3.10 |
| 215 | STOCK1N-04641 | 309.36 | 23 | 3.05 |
| 216 | STOCK1N-00384 | 360.45 | 27 | 3.05 |
| 217 | F0020-0031    | 313.37 | 22 | 3.44 |
| 218 | F0372-0505    | 299.33 | 22 | 3.23 |
| 219 | F0049-0016    | 276.35 | 19 | 3.14 |
| 220 | ZINC33382220  | 286.72 | 20 | 3.77 |
| 221 | ZINC03170843  | 446.71 | 27 | 3.70 |
| 222 | ZINC33382264  | 383.68 | 25 | 3.48 |
| 223 | ZINC20413478  | 475.37 | 34 | 3.31 |
| 224 | ZINC33382250  | 334.22 | 23 | 3.23 |
| 225 | ZINC12367813  | 349.43 | 26 | 3.22 |
| 226 | ZINC01038224  | 370.27 | 24 | 3.17 |
| 227 | ZINC01025111  | 363.45 | 24 | 3.12 |
| 228 | ZINC02161072  | 463.76 | 31 | 3.05 |
| 229 | ZINC24044552  | 294.38 | 20 | 4.06 |
| 230 | ZINC48962820  | 301.15 | 19 | 3.97 |
| 231 | ZINC45025350  | 284.77 | 18 | 3.33 |
| 232 | ZINC48893551  | 279.72 | 19 | 3.24 |
| 233 | ZINC48962858  | 316.18 | 19 | 3.16 |
| 234 | ZINC00126828  | 302.42 | 20 | 3.72 |
| 235 | ZINC01033175  | 454.39 | 30 | 3.18 |
| 236 | ZINC04956632  | 396.26 | 23 | 3.17 |
| 237 | ZINC12367828  | 491.97 | 35 | 3.11 |
| 238 | ZINC00126829  | 322.84 | 20 | 3.11 |
| 239 | ZINC01324022  | 393.44 | 29 | 4.71 |
| 240 | ZINC03984097  | 352.38 | 26 | 3.48 |
| 241 | ZINC20762726  | 437.49 | 32 | 3.36 |
| 242 | ZINC08917944  | 382.41 | 28 | 3.35 |
| 243 | ZINC20762588  | 437.49 | 32 | 3.30 |
| 244 | ZINC00619547  | 292.33 | 22 | 3.08 |
| 245 | ZINC05489491  | 352.38 | 26 | 4.64 |
| 246 | ZINC13127397  | 340.37 | 25 | 4.34 |
| 247 | ZINC18167494  | 312.32 | 23 | 4.33 |
| 248 | ZINC05452024  | 325.36 | 24 | 4.27 |
| 249 | ZINC05451848  | 311.33 | 23 | 4.23 |
| 250 | ZINC05197560  | 354.83 | 25 | 4.20 |
| 251 | ZINC13121705  | 385.25 | 24 | 4.19 |
| 252 | ZINC18098944  | 336.38 | 25 | 4.10 |
| 253 | ZINC08740587  | 352.38 | 26 | 4.10 |
| 254 | ZINC18091290  | 366.41 | 27 | 3.99 |
| 255 | ZINC02328428  | 501.89 | 35 | 3.96 |



---

|     |              |        |    |      |
|-----|--------------|--------|----|------|
| 256 | ZINC13127250 | 326.35 | 24 | 3.90 |
| 257 | ZINC08440369 | 445.73 | 29 | 3.85 |
| 258 | ZINC09058845 | 451.90 | 32 | 3.85 |
| 259 | ZINC13126250 | 314.77 | 22 | 3.84 |
| 260 | ZINC05451863 | 315.75 | 22 | 3.84 |
| 261 | ZINC05451687 | 369.72 | 25 | 3.83 |
| 262 | ZINC05191626 | 354.36 | 26 | 3.74 |
| 263 | ZINC09187792 | 450.91 | 32 | 3.66 |
| 264 | ZINC09042841 | 466.45 | 34 | 3.58 |
| 265 | ZINC09130707 | 458.51 | 34 | 3.58 |
| 266 | ZINC09129721 | 471.33 | 32 | 3.55 |
| 267 | ZINC18251473 | 420.43 | 31 | 3.47 |
| 268 | ZINC02331744 | 443.49 | 33 | 3.47 |
| 269 | ZINC05196960 | 402.44 | 30 | 3.44 |
| 270 | ZINC18114979 | 348.40 | 26 | 3.43 |
| 271 | ZINC18143398 | 372.42 | 28 | 3.40 |
| 272 | ZINC05197609 | 402.44 | 30 | 3.39 |
| 273 | ZINC08973452 | 404.43 | 30 | 3.38 |
| 274 | ZINC09129204 | 435.31 | 28 | 3.35 |
| 275 | ZINC02119473 | 397.38 | 29 | 3.33 |
| 276 | ZINC02120006 | 309.36 | 23 | 3.31 |
| 277 | ZINC09346403 | 441.48 | 33 | 3.31 |
| 278 | ZINC41359251 | 418.44 | 31 | 3.29 |
| 279 | ZINC09346242 | 447.46 | 33 | 3.27 |
| 280 | ZINC09058986 | 455.51 | 34 | 3.24 |
| 281 | ZINC05164064 | 416.47 | 31 | 3.22 |
| 282 | ZINC03985172 | 338.36 | 25 | 3.11 |
| 283 | ZINC09058967 | 434.87 | 31 | 3.11 |
| 284 | ZINC05190694 | 402.44 | 30 | 3.09 |
| 285 | ZINC08024779 | 321.37 | 22 | 3.84 |
| 286 | ZINC20156590 | 321.37 | 22 | 3.32 |
| 287 | ZINC01926850 | 296.36 | 22 | 3.26 |
| 288 | ZINC02526659 | 275.37 | 19 | 3.24 |
| 289 | ZINC49453363 | 312.36 | 22 | 3.22 |
| 290 | ZINC34685252 | 366.41 | 27 | 3.08 |
| 291 | ZINC35457681 | 452.45 | 32 | 3.50 |
| 292 | ZINC35457671 | 452.45 | 32 | 3.47 |
| 293 | ZINC03874886 | 516.54 | 38 | 3.42 |
| 294 | ZINC35457676 | 452.45 | 32 | 3.10 |
| 295 | ZINC05999108 | 344.40 | 25 | 3.06 |
| 296 | ZINC31156952 | 288.34 | 21 | 3.82 |
| 297 | ZINC13383570 | 356.41 | 26 | 3.65 |

---

|     |                 |        |    |       |
|-----|-----------------|--------|----|-------|
| 298 | ZINC13340317    | 288.34 | 21 | 3.54  |
| 299 | ZINC35271371    | 482.48 | 34 | 3.52  |
| 300 | ZINC35271359    | 482.48 | 34 | 3.34  |
| 301 | ZINC33830232    | 358.38 | 26 | 3.26  |
| 302 | ZINC31158018    | 406.43 | 29 | 3.24  |
| 303 | ZINC01595957    | 358.39 | 26 | 3.19  |
| 304 | ZINC13375623    | 319.29 | 23 | 3.18  |
| 305 | ZINC49605558    | 732.86 | 53 | 3.16  |
| 306 | ZINC35465689    | 405.42 | 29 | 3.13  |
| 307 | ZINC35465687    | 405.42 | 29 | 3.10  |
| 308 | ZINC31158028    | 406.43 | 29 | 3.08  |
| 309 | BTB 03180       | 421.72 | 28 | 4.23  |
| 310 | CD 05733        | 551.25 | 35 | 3.14  |
| 311 | BTB 08566       | 214.26 | 16 | 3.44  |
| 312 | NSC 2519        | 278.33 | 21 | 4.33  |
| 313 | NSC 2262        | 314.42 | 23 | 3.41  |
| 314 | AA-504/33806053 | 392.86 | 27 | 3.49  |
| 315 | AA-516/30011006 | 326.80 | 22 | 3.20  |
| 316 | ZINC06576323    | 326.80 | 22 | 3.37  |
| 317 | ZINC48962834    | 286.13 | 18 | 3.29  |
| 318 | ZINC05514370    | 386.44 | 28 | 3.46  |
| 319 | ZINC41358977    | 468.89 | 33 | 3.64  |
| 320 | ZINC09129643    | 428.48 | 32 | 3.59  |
| 321 | ZINC35457628    | 406.43 | 29 | 3.43  |
| 322 | ZINC67912004    | 543.50 | 39 | 3. 90 |
| 323 | ZINC49605557    | 732.86 | 53 | 3.28  |
| 324 | ZINC49605559    | 732.85 | 53 | 3.25  |
| 325 | ZINC20228213    | 368.24 | 22 | 3.02  |
| 326 | ZINC48962842    | 290.72 | 20 | 3.00  |
| 327 | ZINC02098902    | 438.47 | 32 | 3.04  |
| 328 | ZINC05248942    | 269.27 | 20 | 3.04  |
| 329 | ZINC05451566    | 295.33 | 22 | 3.03  |
| 330 | ZINC32919269    | 325.33 | 22 | 3.02  |
| 331 | ZINC00052541    | 317.18 | 19 | 3.01  |
| 332 | ZINC35457667    | 452.45 | 32 | 3.04  |
| 333 | ZINC35457623    | 406.43 | 29 | 3.03  |
| 334 | ZINC67903416    | 538.54 | 38 | 3.03  |
| 335 | ZINC14773836    | 412.56 | 30 | 3.01  |

4. The second round of VS was performed by ligand efficiency (LE) based metric, fit quality (FQ). The HA of 335 compounds were counted, meanwhile the predicted activities, pIC<sub>50</sub>, were generated by 3D-QSAR pharmacophore model, so that the LE and FQ values could be calculated. 3D-QSAR

pharmacophore model was generated from molecules in training set (Table S2) by employing 3D QSAR Pharmacophore Generation module within Discovery Studio.

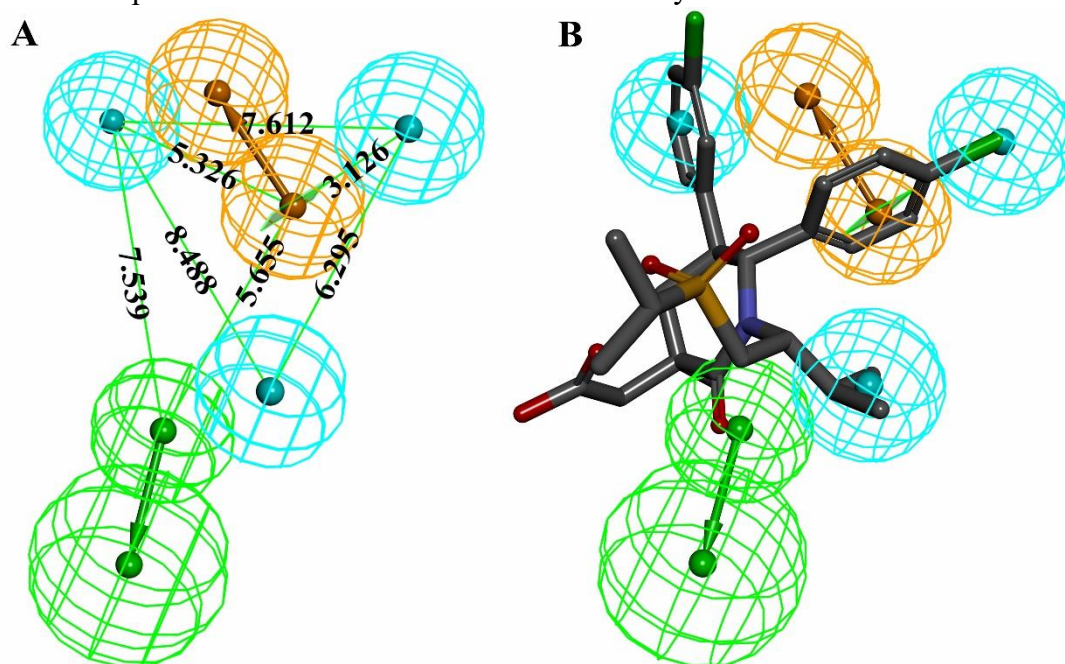

**Figure S2.** (A) The detail information for 3D-QSAR pharmacophore model. (B) The clinical candidate, **AMG232**, was docked into the 3D-QSAR pharmacophore model.

**Table S5.** All 26 compounds with the ranked FQ values (FQ>0.8) were screened in the second VS.

| Name          | Estimate(nM) | pIC50 | LE   | FQ   |
|---------------|--------------|-------|------|------|
| AA-504        | 3.73         | 8.42  | 0.43 | 1.16 |
| STOCK1N-31983 | 3.66         | 8.44  | 0.28 | 1.06 |
| STOCK1N-33491 | 3.48         | 8.46  | 0.26 | 1.04 |
| STOCK1N-33649 | 3.63         | 8.44  | 0.25 | 1.03 |
| ZINC70705922  | 7.44         | 8.13  | 0.28 | 1.02 |
| ZINC090594416 | 60.85        | 7.22  | 0.37 | 1.00 |
| ZINC09130707  | 27.13        | 7.57  | 0.30 | 1.00 |
| STOCK1N-32687 | 10.85        | 7.96  | 0.26 | 0.99 |
| ZINC8385603   | 72.80        | 7.14  | 0.35 | 0.98 |
| ZINC02331744  | 37.48        | 7.43  | 0.31 | 0.98 |
| ZINC59485880  | 23.13        | 7.64  | 0.28 | 0.98 |
| ZINC01027435  | 62.61        | 7.20  | 0.31 | 0.96 |
| ZINC70686605  | 26.15        | 7.58  | 0.26 | 0.96 |
| ZINC01027046  | 143.88       | 6.84  | 0.30 | 0.92 |
| ZINC05164064  | 206.06       | 6.69  | 0.30 | 0.90 |
| ZINC31158028  | 305.12       | 6.52  | 0.31 | 0.89 |
| ZINC05196960  | 274.95       | 6.56  | 0.30 | 0.89 |
| ZINC09058986  | 242.80       | 6.61  | 0.27 | 0.87 |
| ZINC00687864  | 736.98       | 6.14  | 0.31 | 0.85 |
| ZINC41358977  | 393.24       | 6.41  | 0.27 | 0.85 |
| F2029-0601    | 551.99       | 6.26  | 0.28 | 0.84 |

|              |         |      |      |      |
|--------------|---------|------|------|------|
| ZINC02142855 | 579.98  | 6.24 | 0.28 | 0.84 |
| ZINC09346403 | 433.47  | 6.36 | 0.26 | 0.84 |
| NSC 18211    | 1257.71 | 5.90 | 0.29 | 0.81 |
| BTB 05674    | 1247.28 | 5.90 | 0.27 | 0.80 |
| ZINC09346242 | 876.52  | 6.06 | 0.25 | 0.80 |

## 5. Bioassay

### *In vitro antitumor activity.*

Liver hepatocellular carcinoma HepG2 (with wild-type p53) and Hep3B (with p53 null) cell lines were cultured in RPMI 1640 medium containing 10% fetal bovine serum (Gemini Bioproducts) at 37°C in a humidified 5% carbon dioxide humidified incubator.

5-6×10<sup>4</sup> cells per well were plated in 96-well plates (Costar) for 24 h, and the test compounds (prepared in 100% DMSO as a stock solution) were added in triplicate (100µL per well). 8 different concentrations (from 0.05 to 100µM) were tested for each compound. For each assay, the controls included only the medium (blank) and only the cells (positive). After 72 h of incubation, 20 µL of MTT (3-[4,5-dimethylthiazol-2-yl]-2,5-diphenyltetrazoliumbromide) solution (5 mg/mL) was added to each well, and after the samples were shaken for 1 min the plate was incubated further for 4 h at 37°C. Thiobenzodiazepines were dissolved with 150 µL of DMSO and the plates were read using Eon (BioTek) at 570 nm. The IC<sub>50</sub> was then analyzed using GraphPad Prism software.

The cellular growth inhibitory activity was determined using two human osteosarcoma cell lines, HCT116 p53<sup>+/+</sup> (with wild-type p53) and HCT116 p53<sup>-/-</sup> (with p53 deleted, a gift from Dr. Bert Vogelstein, Johns Hopkins University). Cells were cultured in RPMI 1640 medium containing 10% fetal bovine serum (Gemini Bioproducts) at 37°C in a humidified 5% carbon dioxide humidified incubator. 5-6×10<sup>4</sup> cells per well were plated in 96-well plates (Costar) for 24 h, and the test compounds (prepared in 100% DMSO as a stock solution) were added in quadruplicate (100µL per well). 10 different concentrations (from 0 to 100µM) were tested for each compound. For each assay, the controls included only the medium (blank) and only the cells (positive). After 72 h of incubation, 20 µL of MTT (3-[4,5-dimethylthiazol-2-yl]-2,5-diphenyltetrazoliumbromide) solution (5 mg/mL) was added to each well, and after the samples were shaken for 1 min the plate was incubated further for 4 h at 37°C. Thiobenzodiazepines were dissolved with 150 µL of DMSO and the plates were read using Eon (BioTek) at 570 nm. The IC<sub>50</sub> was then analyzed using GraphPad Prism software.

### *Fluorescence Polarization Binding Assay.*

The compounds identified as possible MDM2 inhibitors were purchased from NCI Database. For testing their binding affinities to MDM2 protein, we performed a sensitive and quantitative FP-based binding assay<sup>1,2</sup> using human recombinant His-fused soluble protein MDM2 (residues 1 -118) and a p53-based peptide labeled with a fluorescence tag, termed as PMDM6-F (Anaspec, 10nM). The K<sub>d</sub> value of PMDM6-F with the MDM2 protein was determined to be 3.30 ± 0.12 nM. The fluorescence experiments were performed as described in the literature.<sup>3</sup> Briefly, the fluorescence polarization experiments were read on SpectraMax Paradigm Multi-mode Detection Platform (Molecular Devices) with the 485 nm excitation and 535 nm emission filters. The fluorescence intensities parallel (Intparallel) and perpendicular (Intperpendicular) to the plane of excitation were measured in black 96-well NBS assay plates (Greiner Microton) at room temperature. The background fluorescence intensities of blank samples containing the reference buffer were subtracted, and steady-state fluorescence polarization was calculated using the following equation: P = 1000× (Intparallel –

GIntperpendicular)/ (Intparallel + GIntperpendicular), and the correction factor G ( $G = 0.998$  determined empirically) was introduced to eliminate differences in the transmission of vertically and horizontally polarized light. All fluorescence polarization (FP) values were expressed in millipolarization units (mP). The dose-dependent binding experiments were carried out with serial dilutions (from 0 to 1000  $\mu\text{M}$ ) of the tested compounds in DMSO. A 50  $\mu\text{L}$  sample of the tested samples and preincubated MDM2 protein (10 nM) and PMDM6-F peptide (10 nM) in the assay buffer (100 mM potassium phosphate, pH 7.5; 100  $\mu\text{g/mL}$  bovine gamma globulin; 0.02% sodium azide) were added in the black 96-well NBS assay plates (Greiner Microlon) to produce a final volume of 125  $\mu\text{L}$ . For each assay, the controls included the MDM2 protein and PMDM6-F (equivalent to 0% inhibition) and only the PMDM6-F peptide (equivalent to 100% inhibition). The polarization values were measured after 0.5h of the mixing of all assay components. Binding constant ( $K_i$ ) and inhibition curves were fitted using GraphPad Prism software and a web-based computer program developed by Wang.<sup>4</sup>

6. The chemical structures, the curve of inhibitory and the binding modes of the six hits.

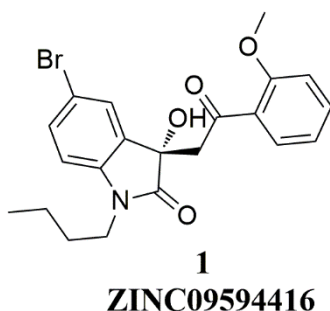

Figure S3 the structure of ZINC09594416

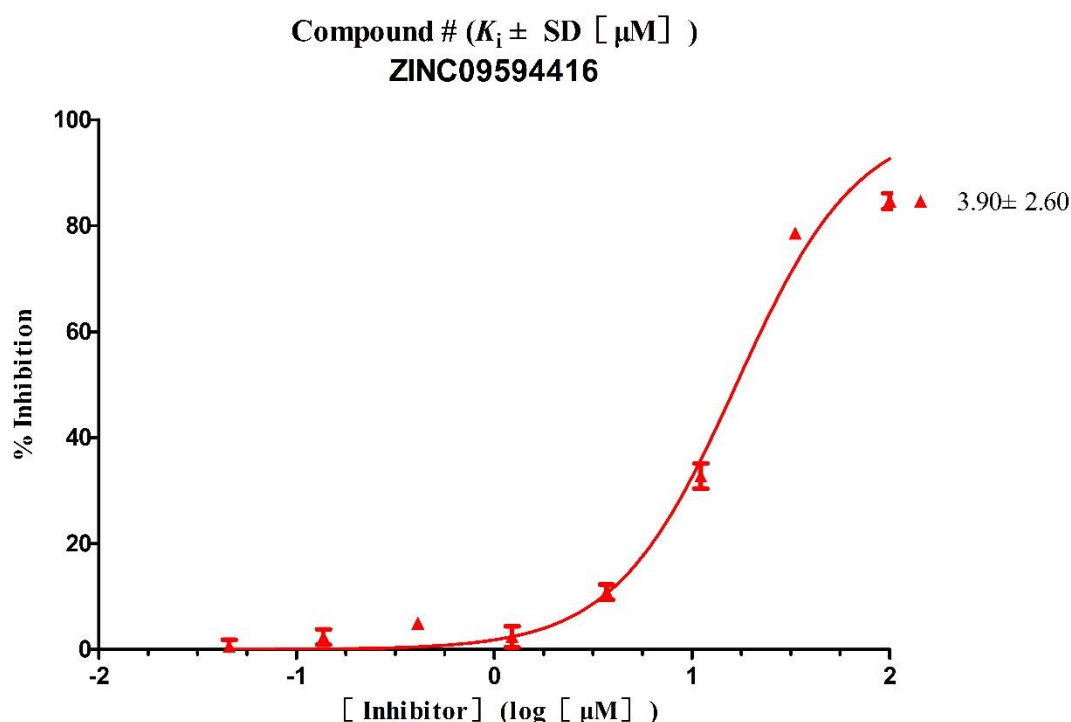

**Figure S4** the curve of inhibitory of ZINC09594416

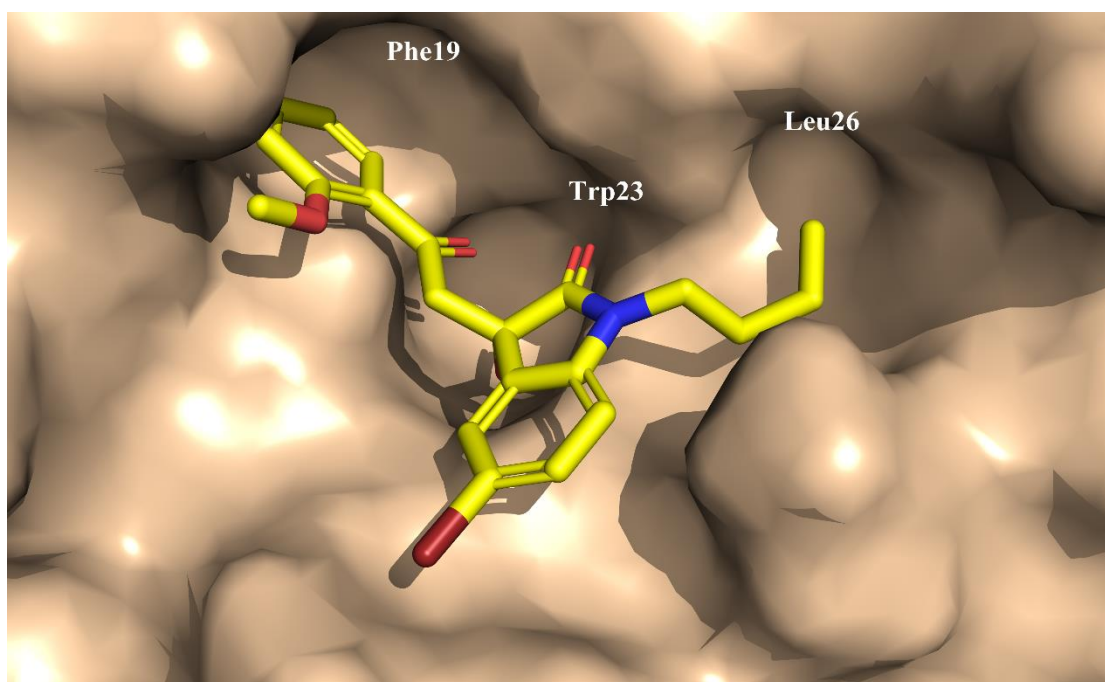

**Figure S5** Predicted binding modes of ZINC09594416 to MDM2. The protein displayed as a gray surface and its key residues were shown with labels. All compounds are shown with only backbone atoms.

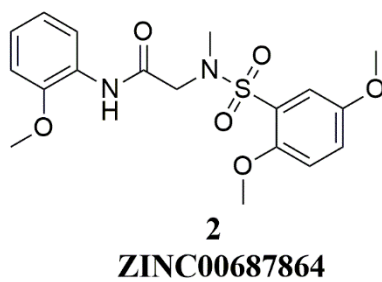

**Figure S6** the structure of ZINC00687864

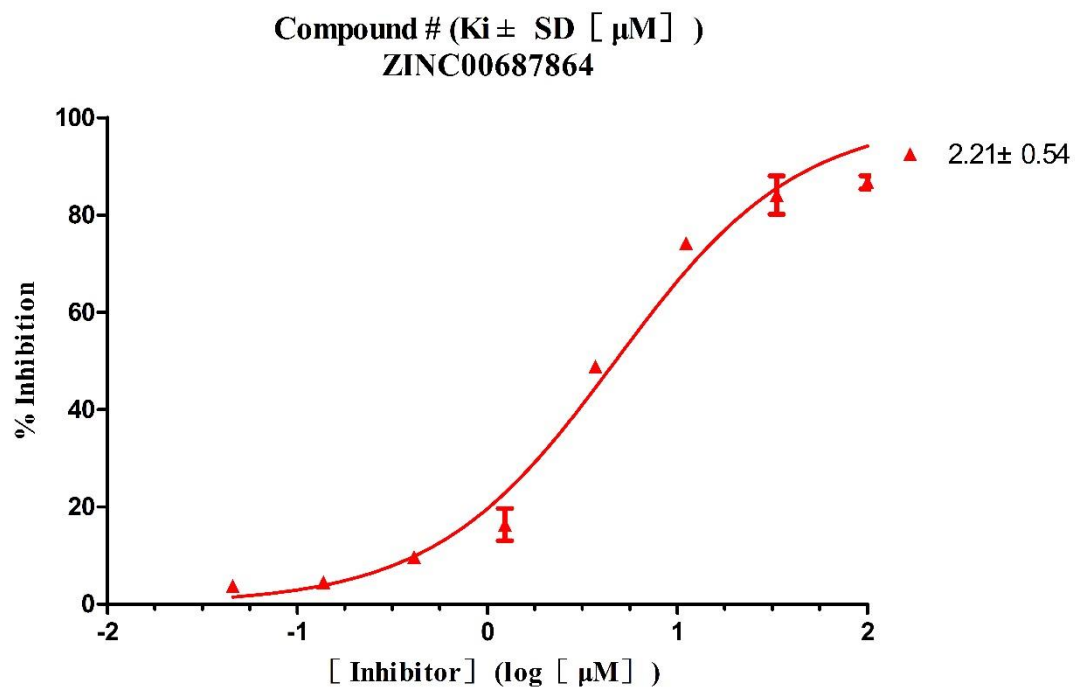

**Figure S7** the curve of inhibitory of ZINC00687864

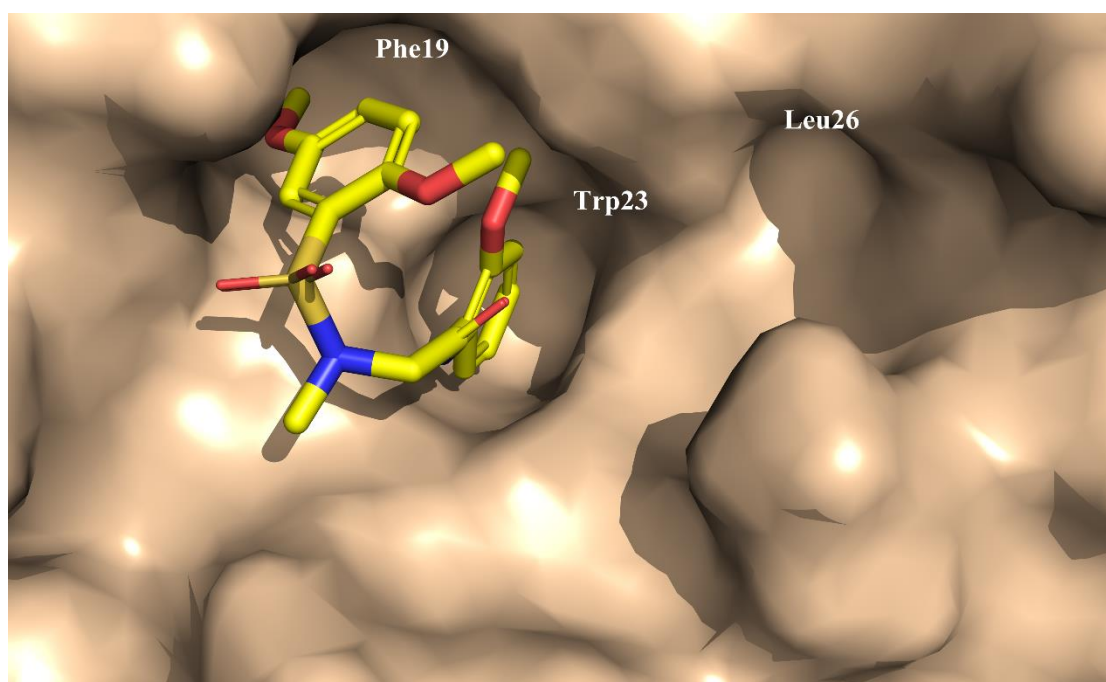

**Figure S8** Predicted binding modes of ZINC00687864 to MDM2. The protein displayed as a gray surface and its key residues were shown with labels. All compounds are shown with only backbone atoms.

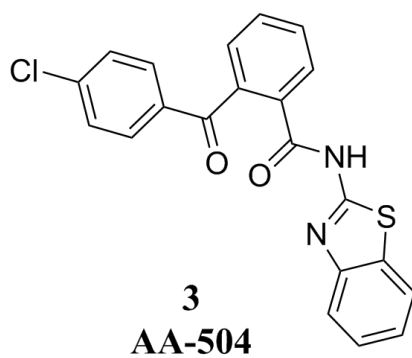

**Figure S9** the structure of AA-504

Compound # ( $K_i \pm SD$  [ $\mu\text{M}$ ] )  
AA-504

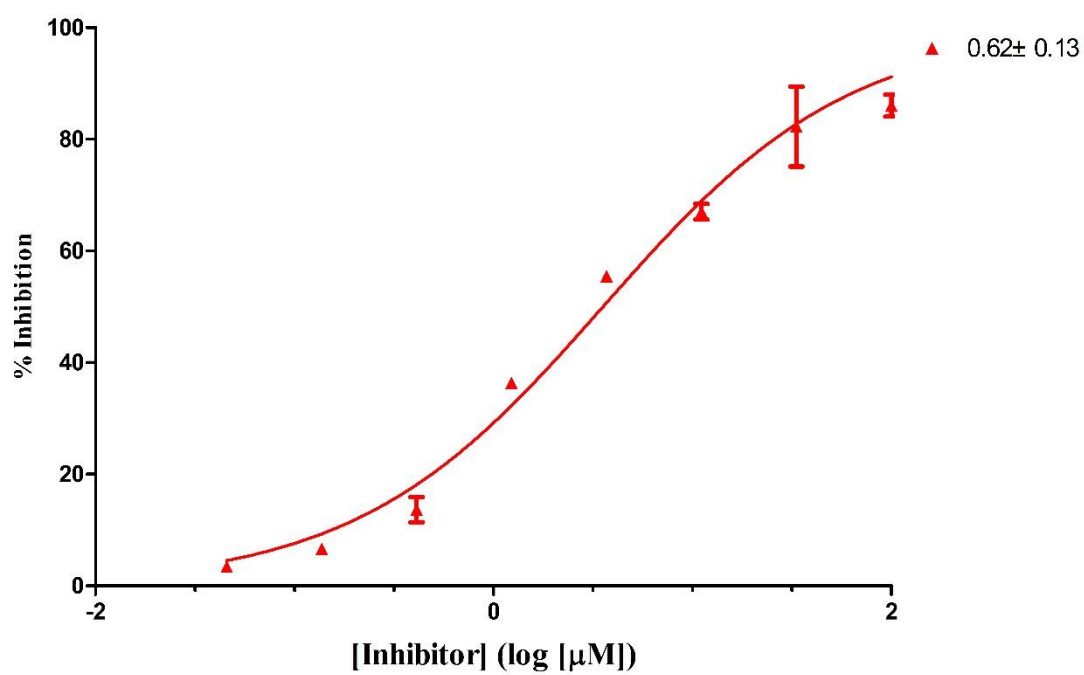

**Figure S10** the curve of inhibitory of AA-504



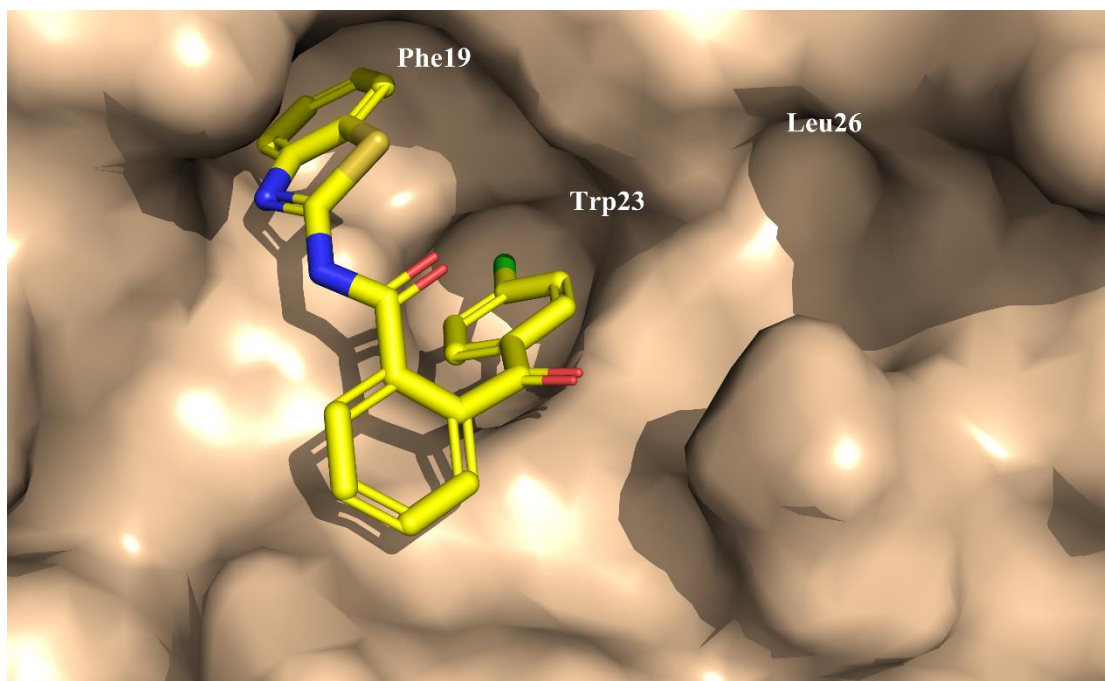

**Figure S11** Predicted binding modes of compound **AA-504** to MDM2. The protein displayed as a gray surface and its key residues were shown with labels. All compounds are shown with only backbone atoms.

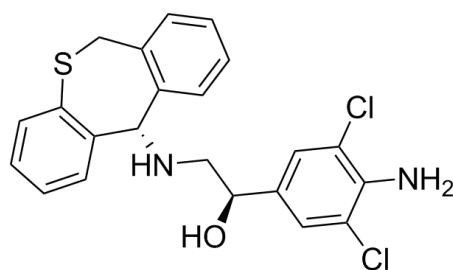

**4**

**ZINC8385603**

**Figure S12** the structure of **ZINC8385603**

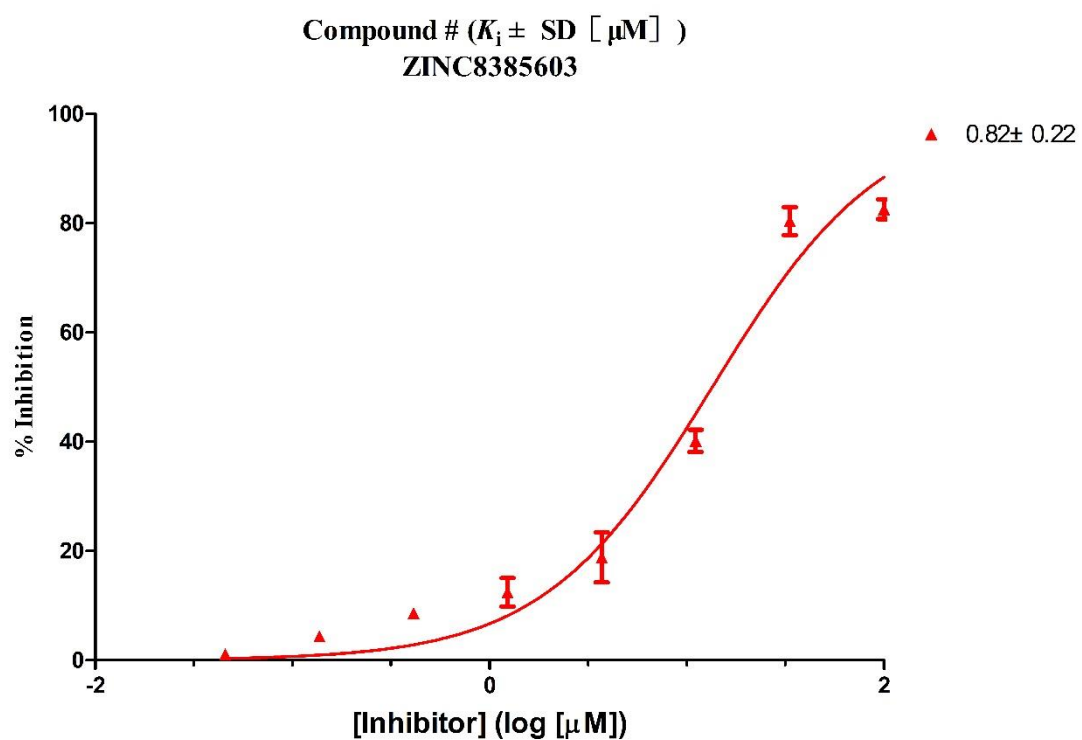

**Figure S13** the curve of inhibitory of ZINC8385603

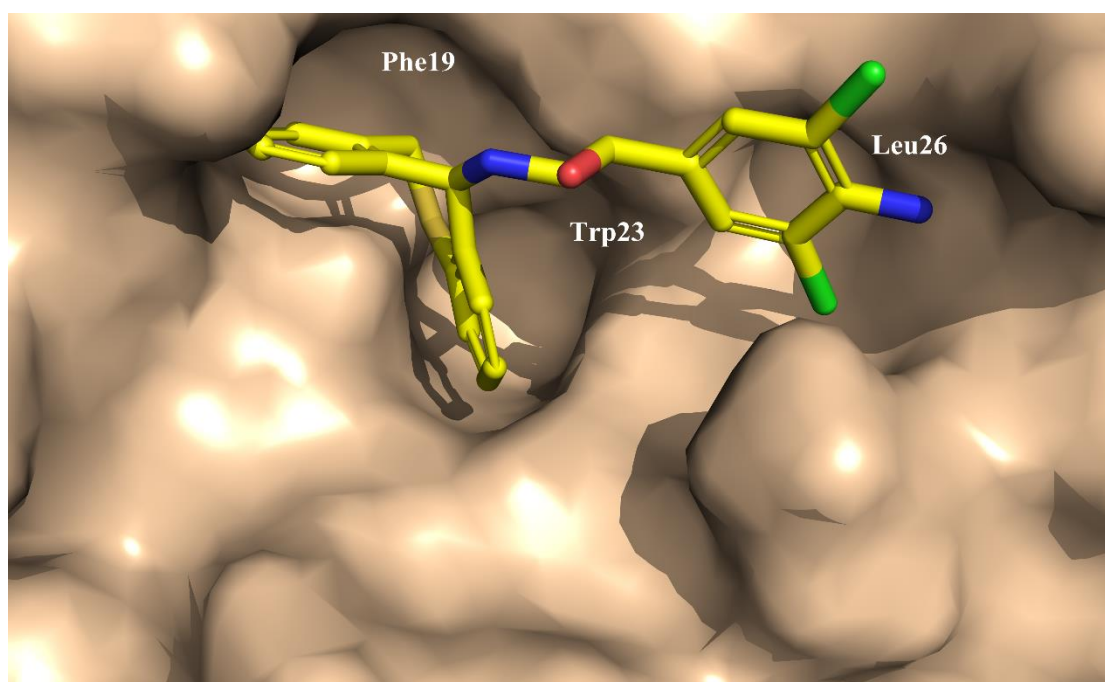

**Figure S14** Predicted binding modes of ZINC8385603 to MDM2. The protein displayed as a gray surface and its key residues were shown with labels. All compounds are shown with only backbone atoms.

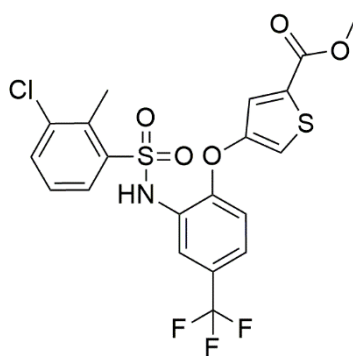

**5**

**ZINC01027435**

**Figure S15** the structure of **ZINC01027435**

**Compound # ( $K_i \pm$  SD [  $\mu$ M] )**  
**ZINC01027435**

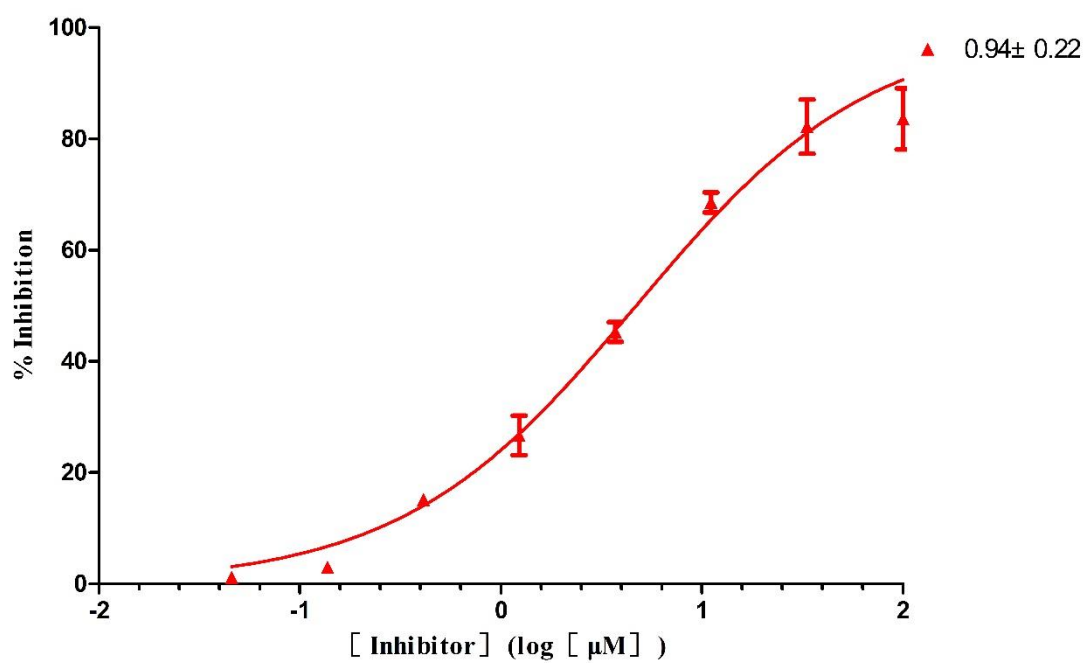

**Figure S16** the curve of inhibitory of **ZINC01027435**

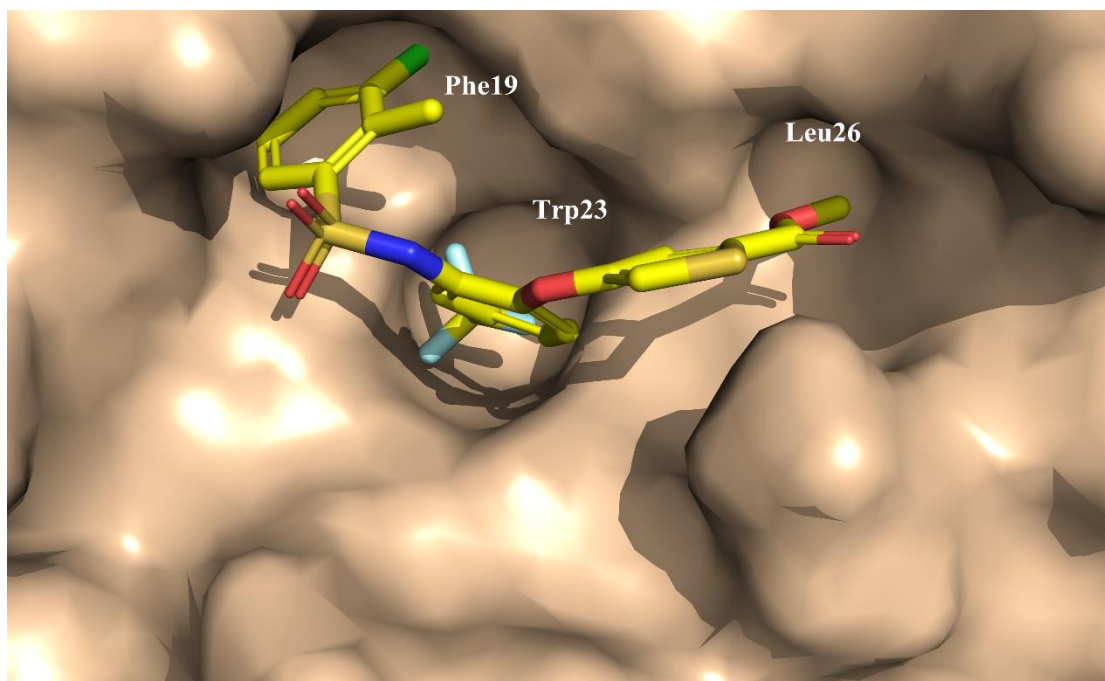

**Figure S17** Predicted binding modes of **ZINC01027435** to MDM2. The protein displayed as a gray surface and its key residues were shown with labels. All compounds are shown with only backbone atoms.

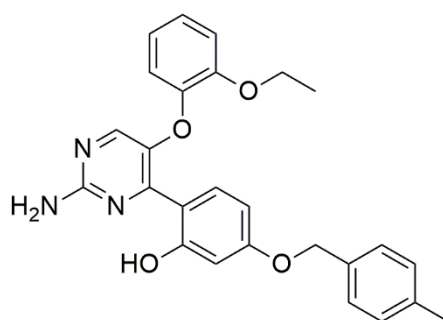

**6**  
**ZINC02331744**

**Figure S18** the structure of **ZINC02331744**

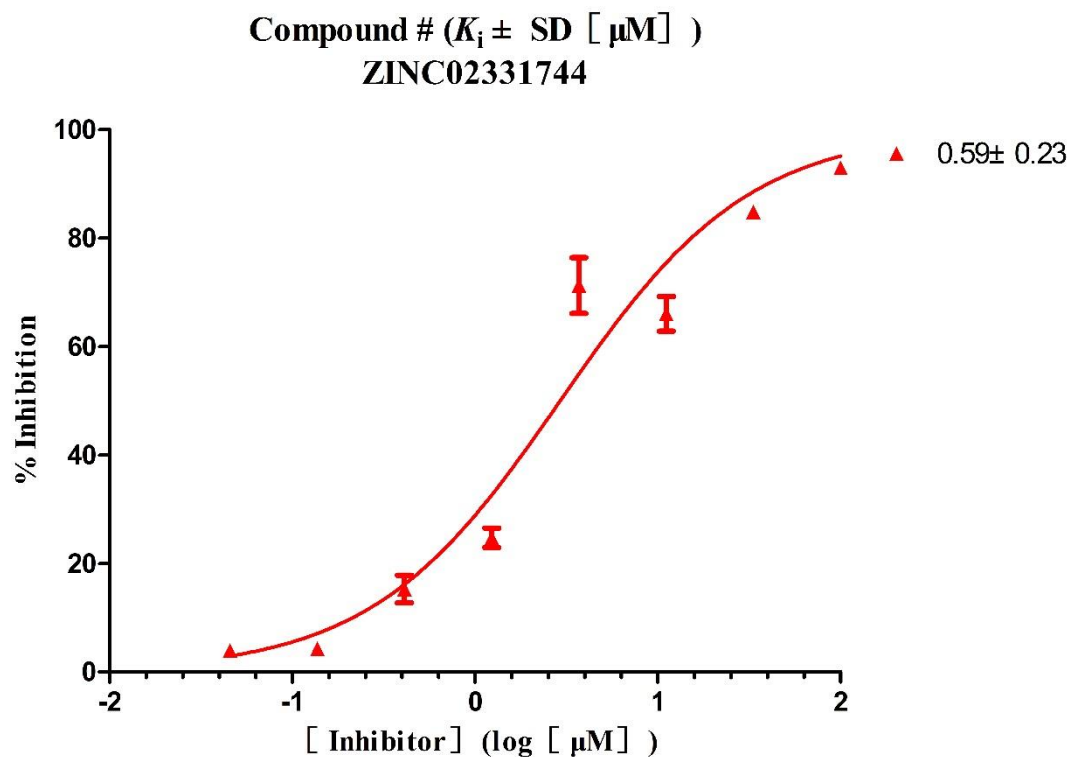

Figure S19 the curve of inhibitory of ZINC02331744

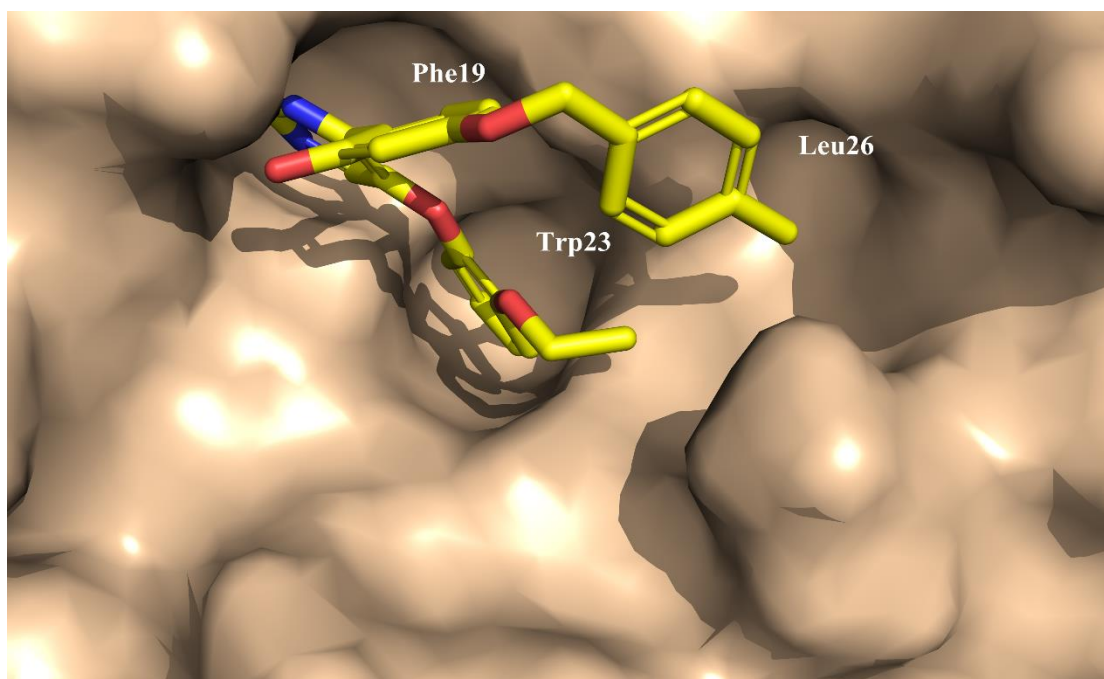

Figure S20 Predicted binding modes of ZINC02331744 to MDM2. The protein displayed as a gray surface and its key residues were shown with labels. All compounds are shown with only backbone atoms.

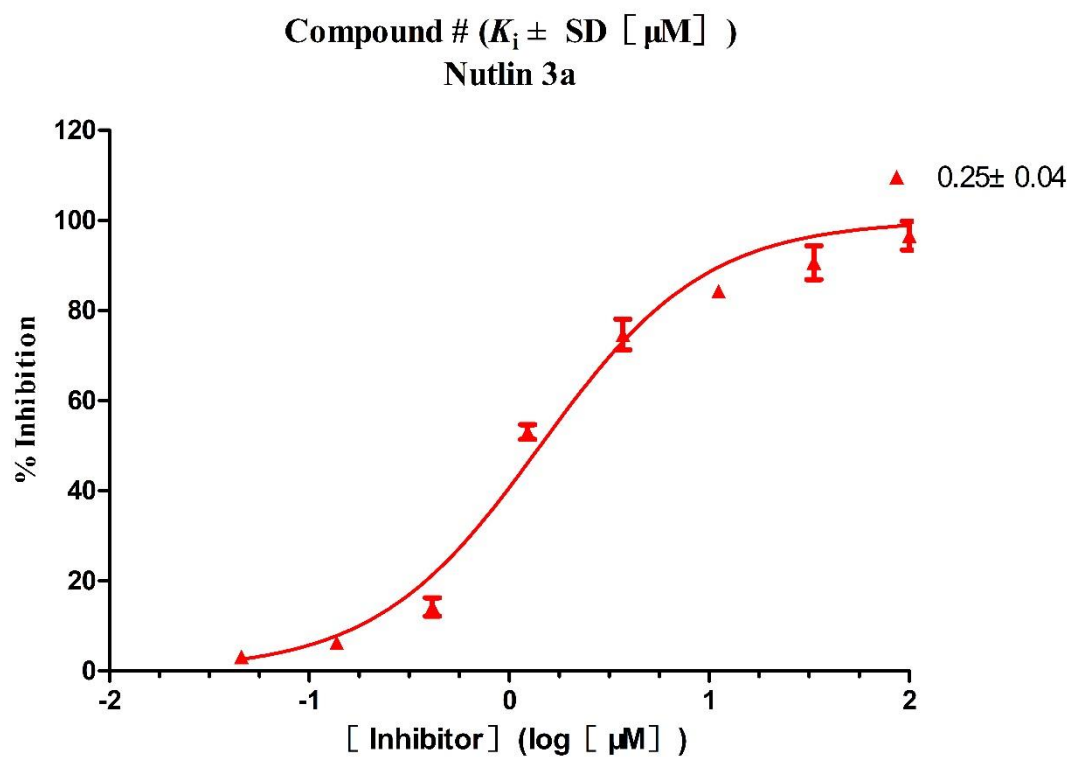

Figure S21 the curve of inhibitory of Nutlin 3a

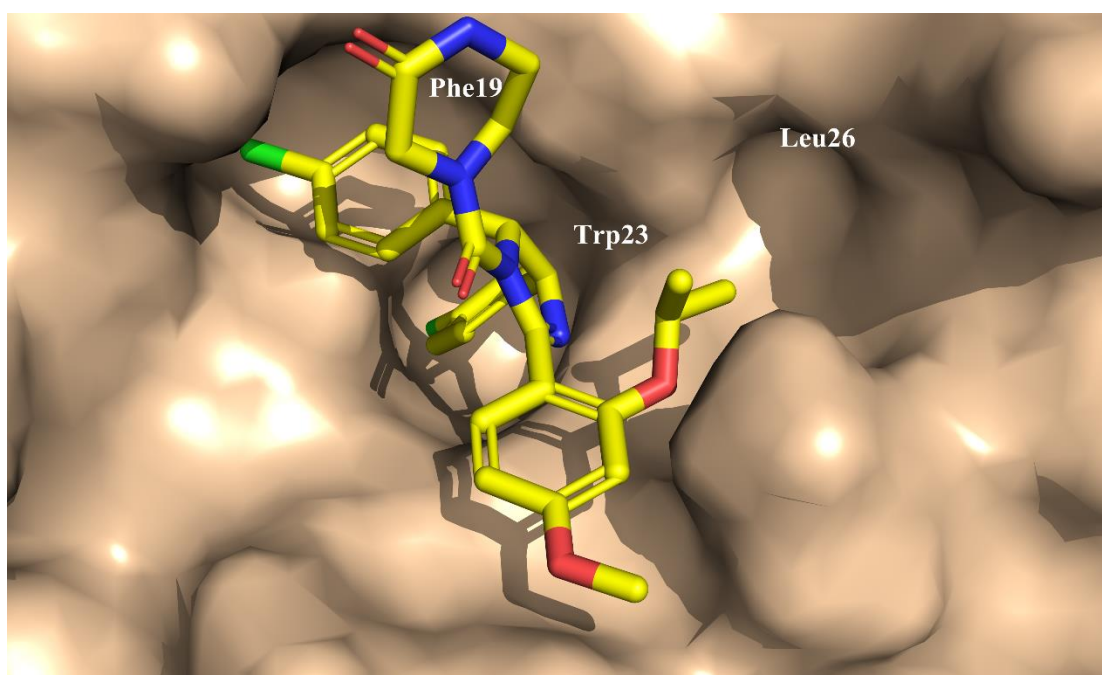

Figure S22 Predicted binding modes of Nutlin 3a to MDM2. The protein displayed as a gray surface and its key residues were shown with labels. All compounds are shown with only backbone atoms.



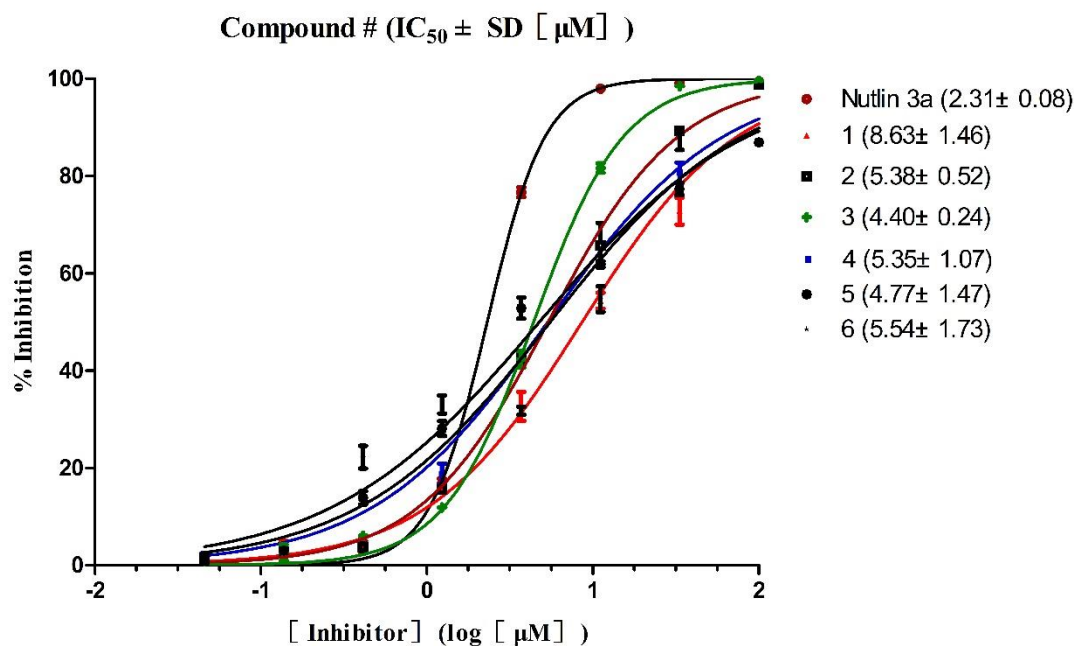

**Figure S23.** Curves of small-molecule inhibitors to MDM2/p53 PPI against HepG2 cell line.

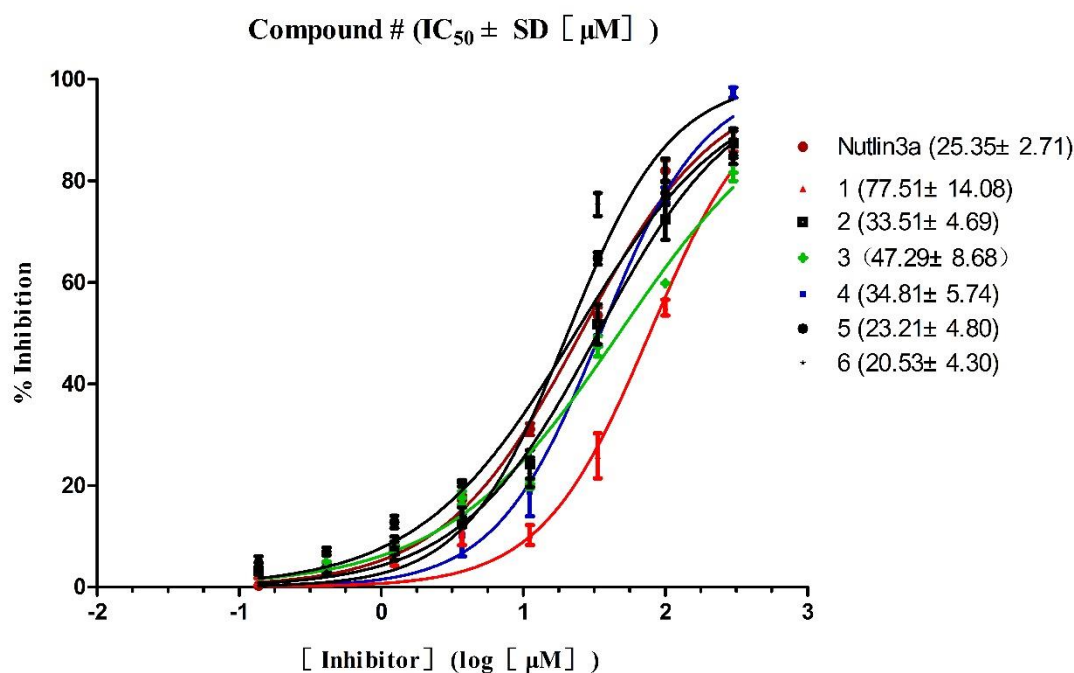

**Figure S24.** Curves of small-molecule inhibitors to MDM2/p53 PPI against Hep3B cell line.

## REFERENCES

1. Bowman, A. L.; Nikolovska-Coleska, Z.; Zhong, H.; Wang, S.; Carlson, H. A. Small molecule inhibitors of the MDM2-p53 interaction discovered by ensemble-based receptor models. *J. Am. Chem. Soc.* **2007**, 129 (42), 12809-14.
2. Zhuang, C.; Miao, Z.; Zhu, L.; Dong, G.; Guo, Z.; Wang, S.; Zhang, Y.; Wu, Y.; Yao, J.; Sheng, C.; Zhang, W. Discovery, synthesis, and biological evaluation of orally active pyrrolidone derivatives as novel inhibitors of p53-MDM2 protein-protein interaction. *J. Med. Chem.* **2012**, 55 (22), 9630-42.

3. Popowicz, G. M.; Czarna, A.; Wolf, S.; Wang, K.; Wang, W.; Domling, A.; Holak, T. A. Structures of low molecular weight inhibitors bound to MDMX and MDM2 reveal new approaches for p53-MDMX/MDM2 antagonist drug discovery. *Cell Cycle* **2010**, 9 (6), 1104-11.
4. Nikolovska-Coleska, Z.; Wang, R.; Fang, X.; Pan, H.; Tomita, Y.; Li, P.; Roller, P. P.; Krajewski, K.; Saito, N. G.; Stuckey, J. A.; Wang, S. Development and optimization of a binding assay for the XIAP BIR3 domain using fluorescence polarization. *Anal. Biochem.* **2004**, 332 (2), 261-73.
